# Supplementary material for: Carbon–Halogen Bond Activation by Selenium‐Based Chalcogen Bonding
Source: PubMed Central journal article supplement — Angew Chem Int Ed Engl. 2017 Jul 6;56(39):12009–12. doi: 10.1002/anie.201704816 (PMC5638094; doi:10.1002/anie.201704816), 2017-07-06
Supplement: ANIE-56-12009-s001.pdf [file ANIE-56-12009-s001.pdf]

## Supporting Information

### **Carbon–Halogen Bond Activation by Selenium-Based Chalcogen Bonding**

*Patrick Wonner, Lukas Vogel, Maximilian Düser, Luís Gomes, Florian Kniep, Bert Mallick, Daniel B. Werz, and Stefan M. Huber\**

anie\_201704816\_sm\_miscellaneous\_information.pdf

# *Table of Contents*

|           |                                                                |           |
|-----------|----------------------------------------------------------------|-----------|
| <b>1.</b> | <b><i>Experimental Section</i></b> .....                       | <b>2</b>  |
| 1.1.      | General Remarks .....                                          | 2         |
| 1.2.      | Solvents.....                                                  | 2         |
| 1.3.      | Chemicals .....                                                | 2         |
| 1.4.      | Analysis Methods .....                                         | 2         |
| 1.5.      | Synthesis Procedures of known compounds.....                   | 3         |
| 1.6.      | Synthesis Procedures of new compounds.....                     | 5         |
| <b>2.</b> | <b><i>Catalysis Experiments – Benchmark reaction</i></b> ..... | <b>27</b> |
| <b>3.</b> | <b><i>Titration Experiments</i></b> .....                      | <b>28</b> |
| <b>4.</b> | <b><i>Determination <math>k_{rel}</math> values</i></b> .....  | <b>29</b> |
| <b>5.</b> | <b><i>DFT Calculations</i></b> .....                           | <b>30</b> |
| <b>6.</b> | <b><i>Selected NMR Spectra</i></b> .....                       | <b>33</b> |
| <b>7.</b> | <b><i>XRD Data</i></b> .....                                   | <b>37</b> |

# **1. Experimental Section**

## **1.1. General Remarks**

All experiments were carried out in flame dried *Schlenk* flasks under argon atmosphere and with dry solvents. Solvents used for chromatography were previously distilled. All used chemicals are commercially available and were used without further purification. Thin-layer chromatography was performed by using *Merck TLC aluminium sheets* (silica gel 60, F254). Column chromatography was performed with silica gel (grain size 0.04-0.063 cm, *Merck Si60*) at atmospheric pressure (1-1.5 atm, using in some cases a hand pump). The corresponding solvents that were used as eluents as well as the  $R_f$  values are listed at the corresponding experiment. Detection of the substances was achieved by fluorescence detection under UV light (wavelength  $\lambda = 254$  nm).

## **1.2. Solvents**

Dry DCM, ether and THF were received from a *MBRAUN MB SPS-800*. At first solvents were distilled, dried over 4 Å molecular sieve and finally dried on an alox column. Further dry solvents were dried over flame dried 4 Å molecular sieve. The moisture content was determined with a Karl Fischer *Titroline*<sup>®</sup>7500KF trace.

## **1.3. Chemicals**

Chemicals were obtained from *ABCR*, *Alfa Aesar*, *Carbolution*, *Merck*, *ChemPur*, *Sigma Aldrich* or *VWR*. Commercially available reagents and starting materials were used without further purification (unless mentioned otherwise).

## **1.4. Analysis Methods**

### **1.4.1. NMR Spectroscopy**

<sup>1</sup>H NMR spectra and <sup>13</sup>C NMR spectra were recorded with a *Bruker DPX-250 NMR*, a *Bruker DPX-400 NMR* or a *Aviii 300* spectrometer at 298.5 K. <sup>19</sup>F NMR spectra were recorded with a *Bruker DPX-250 NMR* spectrometer at 298.5 K. Peaks were referenced to residual <sup>1</sup>H signals and <sup>13</sup>C signals from the deuterated solvents and are reported in parts per million (ppm). For <sup>1</sup>H NMR spectroscopically data, <sup>13</sup>C NMR spectroscopically data and <sup>19</sup>F NMR spectroscopically data, multiplicity (s = singlet, d = doublet, dd = doublet of doublet, dddd = doublet of doublet of doublet of doublet, t = triplet, td = triplet of doublet, m = multiplet), the relative integral and the coupling constant (*J* in Hz) are indicated if possible.

### **1.4.2. ATR-IR Measurements**

IR spectra were recorded with a *Shimadzu IR Affinity - 1S* spectrometer and are reported in  $\nu = \text{cm}^{-1}$  and are indicated with w (weak), m (middle), s (strong) or vs (very strong).

### **1.4.3. EI and ESI Measurements**

Mass spectra were recorded with either a Bruker Daltonics Esquire 6000 instrument (ESI) or a VG Instruments Autospec / EBEE-Geometrie (EI).

### **1.4.4. Elemental Analysis**

CHNS Elemental Analysis was performed with a *vario Micro cube* from *Elementar Analysentechnik*.

### **1.4.5. XRD Measurements**

XRD Measurements were performed on a single crystal-X-ray-diffractometer *Kappa Apex II* from Bruker.

## **1.5. Synthesis Procedures of known compounds**

### **1.5.1. Synthesis of Oct-OTf**

Oct-OTf

Chemical Formula:  $\text{C}_9\text{H}_{15}\text{F}_3\text{O}_4\text{S}$

Exact Mass: 276.06431 g/mol

Elemental Analysis: C, 39.13; H, 5.47; F, 20.63; O, 23.16; S, 11.60

Octyltrifluoromethanesulfoante was synthesised according to an already published procedure.<sup>[1]</sup> The purity of Oct-OTf was determined by  $^1\text{H}$  NMR and  $^{19}\text{F}$  NMR spectroscopy.

### **1.5.2. Synthesis of *i*Pr-OTf**

*i*Pr-OTf

Chemical Formula:  $\text{C}_4\text{H}_7\text{F}_3\text{O}_3\text{S}$

Exact Mass: 192.00680 g/mol

Elemental Analysis: C, 25.00; H, 3.67; F, 29.66; O, 24.98; S, 16.68

*iso*-Propyltrifluoromethanesulfoante was synthesised according to an already published procedure.<sup>[1]</sup> The purity of *i*Pr-OTf was determined by  $^1\text{H}$  NMR and  $^{19}\text{F}$  NMR spectroscopy.

### 1.5.3. Synthesis of *syn/anti-3*

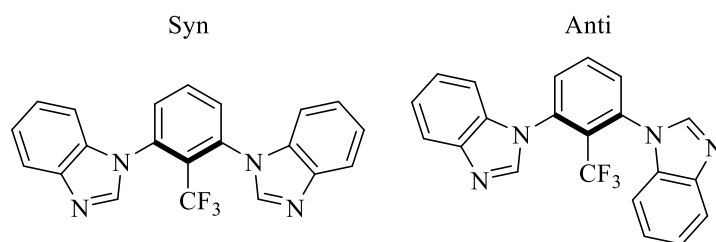

Chemical Formula: C<sub>21</sub>H<sub>13</sub>F<sub>3</sub>N<sub>4</sub>

Exact Mass: 378.10923 g/mol

Elemental Analysis: C, 66.66; H, 3.46; F, 15.06; N, 14.81

*syn/anti-3* was synthesised according to an already published procedure.<sup>[1]</sup> The *syn* and *anti*-isomer cannot be separated by column chromatography. The *anti*-isomer represents the major product (ratio *anti* : *syn* = 60:40).

### 1.5.4. Synthesis of *syn-10<sup>I</sup>*

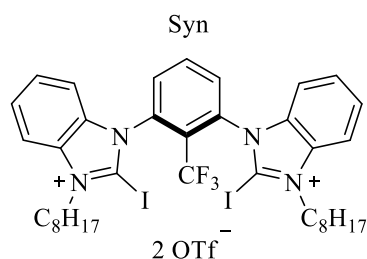

Chemical Formula: C<sub>39</sub>H<sub>45</sub>F<sub>9</sub>I<sub>2</sub>N<sub>4</sub>O<sub>6</sub>S<sub>2</sub>

Exact Mass: 1154,07152 g/mol

Elemental Analysis: C, 40.57; H, 3.93; F, 14.81; I, 21.98; N, 4.85; O, 8.31; S, 5.55

*Syn-10<sup>I</sup>* was synthesised according to an already published procedure.<sup>[1]</sup>

### 1.5.5. Synthesis of *Syn-10<sup>Br</sup>*

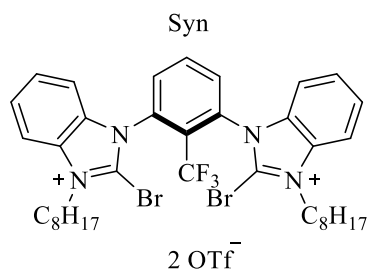

Chemical Formula: C<sub>39</sub>H<sub>45</sub>Br<sub>2</sub>F<sub>9</sub>N<sub>4</sub>O<sub>6</sub>S<sub>2</sub>

Exact Mass: 1058,09926 g/mol

Elemental Analysis: C, 44.16; H, 4.28; Br, 15.07; F, 16.12; N, 5.28; O, 9.05; S, 6.04

*Syn-10<sup>Br</sup>* was synthesised according to an already published procedure.<sup>[1]</sup>

## 1.6. Synthesis Procedures of new compounds

### 1.6.1. Synthesis of *syn/anti-4*<sup>N-Oct</sup>

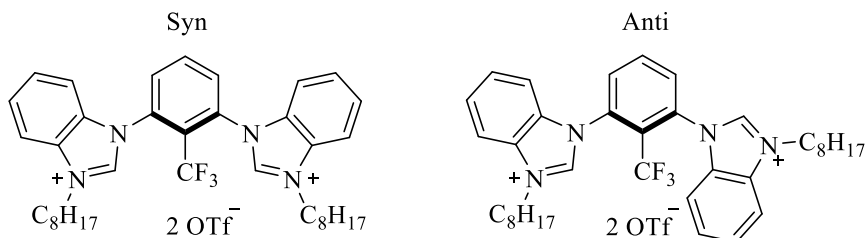

Chemical Formula: C<sub>39</sub>H<sub>47</sub>F<sub>9</sub>N<sub>4</sub>O<sub>6</sub>S<sub>2</sub>

Exact Mass: 902.27823 g/mol

Elemental Analysis: C, 51.88; H, 5.25; F, 18.94; N, 6.21; O, 10.63; S, 7.10

Under an argon atmosphere 3.00 g of compound *syn/anti-3* (7.93 mmol, 1 eq.) were dissolved in 50 ml dry DCM (0.16 M) and 8.76 g of octyltrifluoromethanesulfonate (7.30 ml, 31.72 mmol, 4 eq.) were added over a period of 1h under ice bath cooling. After heat development stopped the mixture was stirred for further 4 days while *syn/anti-4*<sup>N-Oct</sup> precipitated as solid compound. After the solvent was removed crude *syn/anti-4*<sup>N-Oct</sup> was washed with DEE and pentane yielding 6.00 g (6.65 mmol, 84%) of *syn/anti-4*<sup>N-Oct</sup> as white solid. A separation of the *syn*- and the *anti*-isomer is not possible. The *anti*-isomer represents the major product (ratio *anti* : *syn* = 60:40).

#### <sup>1</sup>H NMR (250 MHz, Acetonitrile-*d*<sub>3</sub>):

δ [ppm] = 9.56 (s, 2H), 8.29 (m, 1H), 8.14 (m, 2H), 8.06 (m, 2H), 7.75 (m, 6H),  
4.60 (ttd, J = 6.8, 4.3, 2.0 Hz, 4H), 2.07 (t, J = 7.3 Hz, 4H), 1.31 (m, 20H),  
0.86 (h, J = 3.2 Hz, 6H). Overlap of signals of the *syn*- and the *anti*-isomer.

#### <sup>13</sup>C NMR (75 MHz, Acetonitrile-*d*<sub>3</sub>):

δ [ppm] = 143.18 (d, J = 10.7 Hz), 137.15, 135.37, 134.62 (d, J = 15.6 Hz), 133.10 (m),  
131.87 (d, J = 6.7 Hz), 129.54 (d, J = 2.6 Hz), 128.90, 121.57 (q, J = 320 Hz),  
114.82 (dd, J = 34.6, 2.4 Hz), 49.23, 32.37 (d, J = 1.6 Hz), 29.63 (d, J = 12.28  
Hz), 29.38 (d, J = 5.50 Hz) 26.86, 23.30, 14.34. Overlap of signals of the *syn*- and  
the *anti*-isomer.

#### <sup>19</sup>F NMR (235 MHz, Acetonitrile-*d*<sub>3</sub>):

δ [ppm] = -55.54 (s, 3F), -55.94 (s, 3F), -79.34 (s, 6F).

**ATR-IR:**

$\tilde{\nu}$  [cm<sup>-1</sup>] = 3007 (w), 2929 (m), 2858 (m), 1737 (w), 1606 (w), 1595 (w), 1558 (s), 1489 (m), 1463 (m), 1415 (w), 1253 (s), 1222 (m), 1139 (vs), 1045 (w), 1028 (vs), 914 (w), 831 (w), 775 (w), 752 (m), 634 (vs), 572 (m), 514 (vs).

**ESI-MS:**

$m/z$  (+) = calc. 302.18 [M]<sup>2+</sup> and 604.37 [M]<sup>+</sup>; found 319.07 [M + NH<sub>4</sub>]<sup>2+</sup>, 603.00 [M]<sup>+</sup>.

$m/z$  (-) = calc. 148.95 [M]<sup>-</sup>; found 148.57 [M]<sup>-</sup>.

**1.6.2. Synthesis of *syn/anti-4*<sup>N-Me</sup>**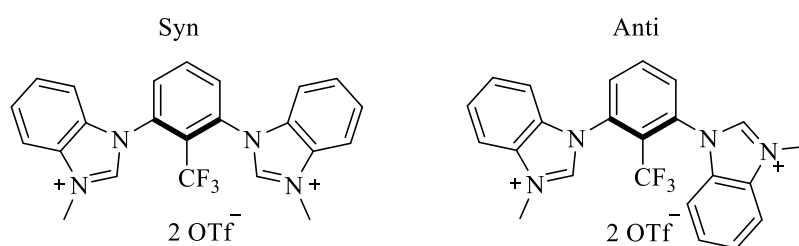

Chemical Formula: C<sub>25</sub>H<sub>19</sub>F<sub>9</sub>N<sub>4</sub>O<sub>6</sub>S<sub>2</sub>

Exact Mass: 706.05913 g/mol

Elemental Analysis: C, 42.50; H, 2.71; F, 24.20; N, 7.93; O, 13.59; S, 9.08

Under an argon atmosphere 3.00 g of compound *syn/anti-3* (7.93 mmol, 1 eq.) were dissolved in 50 ml dry DCM (0.16 M) and 5.21 g of methyltrifluoromethanesulfonate (3.47 ml, 31.72 mmol, 4 eq.) were added over a period of 1h under ice bath cooling. After heat development stopped the mixture was stirred for further 4 days while *syn/anti-4*<sup>N-Me</sup> precipitated as solid compound. After the solvent was removed crude *syn/anti-4*<sup>N-Me</sup> was washed with DEE and pentane yielding 5.40 g (7.64 mmol, 96%) of *syn/anti-4*<sup>N-Me</sup> as dark solid. A separation of the *syn*- and the *anti*-isomer is not possible. The *anti*-isomer represents the major product (ratio *anti* : *syn* = 60:40).

**<sup>1</sup>H NMR (250 MHz, Acetonitrile-*d*<sub>3</sub>):**

$\delta$  [ppm] = 9.51 (d,  $J$  = 23.0 Hz, 2H), 8.26 (m, 1H), 8.08 (s, 4H), 7.78 (m, 6H), 4.23 (s, 6H).

Overlap of signals of the *syn*- and the *anti*-isomer.

**<sup>13</sup>C NMR (75 MHz, Acetonitrile-*d*):**

$\delta$  [ppm] = 143.89, 137.20 (d,  $J = 9.4$  Hz), 135.44 (d,  $J = 9.26$  Hz), 134.37 (d,  $J = 10.16$  Hz), 132.79, 29.24 (dd,  $J = 2.93$  Hz, 43.24 Hz), 120.75 (q,  $J = 320.02$  Hz), 114.89, 114.38 (d,  $J = 7.66$  Hz), 14, 36.02, 35.13 (d,  $J = 2.83$  Hz). Overlap of signals of the *syn*- and the *anti*-isomer.

**<sup>19</sup>F NMR (235 MHz, Acetonitrile-*d*):**

$\delta$  [ppm] = -55.52 (s, 3F), -55.74 (s, 3F), -79.58 (s, 6F).

**ATR-IR:**

$\tilde{\nu}$  [cm<sup>-1</sup>] = 3142 (w), 3084 (w), 1616 (w), 1593 (w), 1566 (s), 1463 (m), 1425 (w), 1402 (w), 1327 (w), 1244 (s), 1224 (m), 1182 (w), 1165 (w), 1145 (w), 1132 (w), 1111 (w), 1028 (vs), 893 (w), 833 (m), 796 (w), 775 (w), 758 (s), 696 (w), 678 (w), 572 (m), 563 (w), 516 (vs), 445 (w).

**ESI-MS:**

$m/z$  (+) = calc. 204.07 [M]<sup>2+</sup> and 408.15 [M]<sup>+</sup>; found 204.21 [M]<sup>2+</sup>, 406.86 [M]<sup>+</sup>.

$m/z$  (-) = calc. 148.95 [M]<sup>-</sup>; found 148.57 [M]<sup>-</sup>.

### 1.6.3. Synthesis of 7<sup>H</sup>

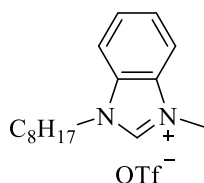

Chemical Formula: C<sub>17</sub>H<sub>25</sub>F<sub>3</sub>N<sub>2</sub>O<sub>3</sub>S

Exact Mass: 394.15380 g/mol

$m/z$ : 394.1538 (100.0%), 395.1572 (18.4%), 396.1496 (4.5%), 396.1605 (1.6%)

Under an argon atmosphere 3.07 g of 1-methylbenzimidazole (23.2 mmol, 1 eq.) was dissolved in 60 ml dry DCM (0.38M) and was cooled to 0 °C. After stirring for 15 min. at 0 °C 7.30 g of octyltrifluoromethanesulfoante (6.08 ml, 27.8 mmol, 1.2 eq.) was slowly added over 1h. After stirring for 24 h at r.t. the solvent was removed under reduced pressure. The colourless liquid was washed with 50 ml DEE and pentane (3×50 ml) under precipitation of 7<sup>H</sup>. After filtration and removal of solvent residuals 8.24 g of 7<sup>H</sup> (20.8 mmol, 90%) were obtained as white solid.



**<sup>1</sup>H NMR (300 MHz, Chloroform-*d*):**

$\delta$  [ppm] = 9.79 (s, 1H), 7.72 (m, 4H), 4.48 (m, 2H), 4.18 (s, 3H), 2.02 (m, 2H),  
1.28 (m, 12H), 0.82 (m, 3H).

**<sup>13</sup>C NMR (100 MHz, Chloroform-*d*):**

$\delta$  [ppm] = 142.60, 131.80 (d,  $J = 70.0$  Hz), 127.44, 120.75 (q,  $J = 320.1$  Hz), 113.01 (d,  $J =$   
16.0 Hz), 47.82, 33.67, 31.75, 29.22 (d,  $J = 27.6$  Hz), 26.67, 22.65, 14.12.

**<sup>19</sup>F NMR (235 MHz, Chloroform-*d*):**

$\delta$  [ppm] = -78.54 (s, 3F)

**ATR-IR:**

$\tilde{\nu}$  [cm<sup>-1</sup>] = 3157 (w), 2929 (m), 2858 (m), 1739 (w), 1622 (w), 1571 (m), 1433 (m), 1379  
(w), 1355 (w), 1251 (vs), 1224 (m), 1161 (vs), 1099 (w), 1028 (vs), 947 (w), 887  
(m), 752 (s), 636 (vs), 605 (m), 572 (m), 516 (s), 424 (m).

**ESI-MS:**

$m/z$  (+) = calc. 245.20 [M]<sup>+</sup>; found 244.99 [M]<sup>+</sup>.

$m/z$  (-) = calc. 148.95 [M]<sup>-</sup>; found 148.56 [M]<sup>-</sup>.

**1.6.4. General Selenation Procedure A**

Under an argon atmosphere the respective benzimidazolium compound (1 eq.), elemental selenium powder (2 eq.) and DBU (5 eq.) were added to a microwave flask. Finally, dry acetonitrile (0.17 M) was added and the mixture was stirred in the microwave for 1 h at 150 °C and 14 bar (150 Watt). The mixture was filtered over a plug of silica and rinsed through with ethyl acetate. After the solvent was removed under reduced pressure the respective selenated compound was obtained.

**1.6.5. General Selenation Procedure B**

Under an argon atmosphere the respective bisbenzimidazolium compound (1 eq.) was added to a schlenk flask and dissolved in dry methanol (0.17 M; dried for 24h over molecular sieve). To the solution elemental selenium powder (2.5 eq.) and caesium carbonate (2.5 eq) were added. The mixture was refluxed for 24 h and finally filtered (hot solution) over a short plug of silica and rinsed with DCM. After the solvent was removed the crude solid was purified by column chromatography (solvents are mentioned for specific compounds). Finally, the solvent was removed under reduced pressure and the respective selenated compound was obtained.

### **1.6.6. General Octylation Procedure for Selenated Compounds**

Under an argon atmosphere the respective mono- or bisselenated compound (1 eq.) was dissolved in dry chloroform or DCM and was cooled to 0 °C. Then octyltrifluoromethanesulfonate (exact number of equivalents see at specific compound) was slowly added and the reaction mixture was stirred for 24 h at room temperature. After the solvent was removed under reduced pressure the crude residual was washed several times with DEE and pentane. Finally, the respective octylated selenium compound was obtained.

### **1.6.7. General Methylation Procedure for Selenated Compounds**

Under an argon atmosphere the respective mono- or bisselenated compound (1 eq.) was dissolved in dry chloroform or DCM and cooled to 0 °C. Then methyltrifluoromethanesulfonate (exact number of equivalents see at specific compound) was slowly added and the reaction mixture was stirred for 24 h at room temperature. After the solvent was removed under reduced pressure the crude residual was washed several times with DEE and pentane. Finally, the respective methylated selenium compound was obtained.

### **1.6.8. General *iso*-Propylation Procedure for Selenated Compounds**

Under an argon atmosphere the respective mono- or bisselenated compound (1 eq.) was dissolved in dry chloroform or DCM and cooled to 0 °C. Then *iso*-propyltrifluoromethanesulfonate (exact number of equivalents see at specific compound) was slowly added and the reaction mixture was stirred for 24 h at room temperature. After the solvent was removed under reduced pressure the crude residual was washed several times with DEE and pentane. Finally, the respective *iso*-propylated selenium compound was obtained.

### 1.6.9. Synthesis of *syn*-5<sup>N-Oct</sup>

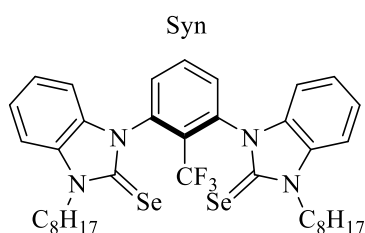

Chemical Formula: C<sub>37</sub>H<sub>45</sub>F<sub>3</sub>N<sub>4</sub>Se<sub>2</sub>

Exact Mass: 762.19268 g/mol

Elemental Analysis: C, 58.42; H, 5.96; F, 7.49; N, 7.37; Se, 20.76

*Syn*-5<sup>N-Oct</sup> was synthesised according to the general selenation procedure B. For the reaction 5.50 g of *syn/anti*-4<sup>N-Oct</sup> (6.09 mmol, 1 eq.), 1.20 g selenium powder (15.2 mmol, 2.5 eq.) and 4.96 g caesium carbonate (15.2 mmol, 2.5 eq.) were used. Purification by column chromatography with pentane:ethyl acetate (2:1) yielded 0.61 g *syn*-5<sup>N-Oct</sup> (0.80 mmol, 13% applied to used amount of substance of *syn/anti* mixture and 33% applied to the *syn* amount of substance in the mixture) as white solid.

**R<sub>f</sub>** = 0.23 (Pentan:EtOAc 4:1)

#### **<sup>1</sup>H NMR (300 MHz, Chloroform-*d*):**

δ [ppm] = 8.12 (t, *J* = 8.1 Hz, 1H), 7.79 (d, *J* = 8.0 Hz, 2H), 7.56 (d, *J* = 8.0 Hz, 2H),  
7.34 (dt, *J* = 20.8, 7.5 Hz, 4H), 7.08 (d, *J* = 7.8 Hz, 2H), 4.46 (m, 4H),  
1.94 (m, 4H), 1.39 (m, 20H), 0.90 (t, *J* = 6.7 Hz, 6H).

#### **<sup>13</sup>C NMR (101 MHz, Acetonitrile-*d*<sub>3</sub>):**

δ [ppm] = 169.76, 137.59, 136.04 (t, *J* = 13.45 Hz), 134.14, 124.72 (d, *J* = 15.2 Hz), 111.19  
(d, *J* = 8.1 Hz), 47.42, 32.46, 29.90 (d, *J* = 5.2 Hz), 28.54, 27.28, 23.33, 14.36.

#### **<sup>19</sup>F NMR (235 MHz, Chloroform-*d*):**

δ [ppm] = -58.16 (s, 3F)

#### **ATR-IR:**

$\tilde{\nu}$  [cm<sup>-1</sup>] = 3043 (w), 2924 (m), 2848 (m), 1926 (w), 1714 (m), 1598 (w), 1467 (w), 1444 (w),  
1404 (w), 1384 (m), 1334 (w), 1303 (m), 1278 (s), 1240 (m), 1180 (m), 1139 (m),  
1039 (m), 1010 (w), 935 (w), 916 (w), 804 (w), 781 (w), 754 (w), 736 (s), 675  
(w), 623 (w), 607 (w), 557 (w), 503 (w), 447 (w), 428 (m).

**EI-MS (70 EV):**

$m/z$  (%) = 762.1 (8)  $[M]^+$ , 691 (5)  $[M-Se+Li]^+$ , 492 (5)  $[C_{29}H_{28}N_4F_3Se]^+$ , 379 (2)  $[C_{21}H_{11}N_4F_3]^+$ .

**1.6.10. Synthesis of anti-5<sup>N-Oct</sup>**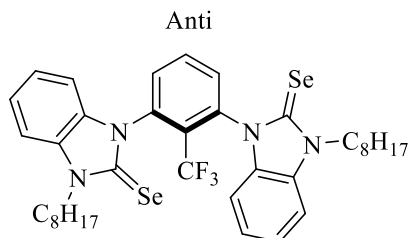

Chemical Formula:  $C_{37}H_{45}F_3N_4Se_2$

Exact Mass: 762.19268 g/mol

Elemental Analysis: C, 58.42; H, 5.96; F, 7.49; N, 7.37; Se, 20.76

*Anti-5<sup>N-Oct</sup>* was synthesised according to the general selenation procedure B. For the reaction 5.50 g of *syn/anti-4<sup>N-Oct</sup>* (6.09 mmol, 1 eq.), 1.20 g selenium powder (15.2 mmol, 2.5 eq.) and 4.96 g caesium carbonate (15.2 mmol, 2.5 eq.) were used. Purification by column chromatography with pentane:ethyl acetate (2:1) yielded 1.76 g *anti-5<sup>N-Oct</sup>* (2.31 mmol, 40% applied to used amount of substance of *syn/anti* mixture and 63% applied to the *anti* amount of substance in the mixture) as beige solid.

$R_f$  = 0.55 (Pentan:EtOAc 4:1)

**<sup>1</sup>H NMR (300 MHz, Chloroform-*d*):**

$\delta$  [ppm] = 8.03 (t,  $J$  = 8.0 Hz, 1H), 7.72 (d,  $J$  = 8.0 Hz, 2H), 7.35 (m, 6H), 7.08 (m, 2H), 4.53 (m, 4H), 1.97 (dq,  $J$  = 15.2, 7.7, 6.9 Hz, 4H), 1.36 (m, 20H), 0.85 (m, 6H).

**<sup>13</sup>C NMR (101 MHz, Acetonitrile-*d*<sub>3</sub>):**

$\delta$  [ppm] = 169.31, 137.71, 136.05, 135.80, 135.50, 134.12, 128.54 (q,  $J$  = 30.5 Hz) 124.84 (d,  $J$  = 2.40 Hz), 111.23 (d,  $J$  = 6.5 Hz), 47.43, 32.44, 29.88 (d,  $J$  = 4.9 Hz), 28.55, 27.27, 23.32, 14.36.

**<sup>19</sup>F NMR (235 MHz, Chloroform-*d*):**

$\delta$  [ppm] = -57.51 (s, 3F)

**ATR-IR:**

$\tilde{\nu}$  [cm<sup>-1</sup>] = 3072 (w), 2924 (s), 2852 (m), 1737 (w), 1600 (w), 1583 (w), 1485 (m), 1469 (m), 1392 (s), 1332 (m), 1301 (w), 1282 (m), 1234 (w), 1219 (w), 1180 (w), 1165 (w), 1139 (m), 1041 (m), 921 (m), 798 (m), 736 (vs), 682 (m), 619 (w), 586 (w), 557 (w), 457 (w), 426 (m).

**EI-MS (70 EV):**

$m/z$  (%) = 762.1 (4) [M]<sup>+</sup>, 240 (18) [C<sub>19</sub>H<sub>12</sub>]<sup>+</sup>, 180 (30) [C<sub>14</sub>H<sub>12</sub>]<sup>+</sup>.

**1.6.11. Synthesis of *syn*-5<sup>N-Me</sup>**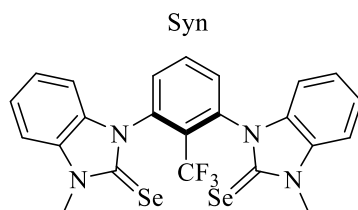

Chemical Formula: C<sub>23</sub>H<sub>17</sub>F<sub>3</sub>N<sub>4</sub>Se<sub>2</sub>

Exact Mass: 565.97357 g/mol

Elemental Analysis: C, 48.95; H, 3.04; F, 10.10; N, 9.93; Se, 27.98

*Syn*-5<sup>N-Me</sup> was synthesised according to the general selenation procedure B. For the reaction 1.13 g of *syn/anti*-4<sup>N-Me</sup> (1.68 mmol, 1 eq.), 0.32 g selenium powder (3.98 mmol, 2.5 eq.) and 1.30 g caesium carbonate (3.98 mmol, 2.5 eq.) were used. Purification by column chromatography with pentane:ethyl acetate (2:1→1:1→1:2→0:1) yielded 0.32 g *syn*-5<sup>N-Me</sup> (0.54 mmol, 33% applied to used amount of substance of *syn/anti* mixture and 80% applied to *syn* amount of substance in the mixture) as colourless solid.

**R<sub>f</sub>** = 0.41 (Pentane:EtOAc 2:1)

**<sup>1</sup>H NMR (400 MHz, Chloroform-*d*):**

$\delta$  [ppm] = 8.00 (t,  $J$  = 8.0 Hz, 1H), 7.72 (d,  $J$  = 8.0 Hz, 2H), 7.27(m, 6H),  
6.87 (d,  $J$  = 7.9 Hz, 2H), 3.99 (d,  $J$  = 3.5 Hz, 6H).

**<sup>13</sup>C NMR (101 MHz, Chloroform-*d*):**

$\delta$  [ppm] = 169.06, 136.57, 134.63, 134.51, 134.20, 133.84, 128.36 (q,  $J$  = 30.2 Hz), 123.75  
(d,  $J$  = 3.4 Hz), 109.65 (d,  $J$  = 24.6 Hz), 33.41.

**<sup>19</sup>F NMR (235 MHz, Chloroform-*d*):**

$\delta$  [ppm] = -57.53 (s, 3F)

**ATR-IR:**

$\tilde{\nu}$  [ $\text{cm}^{-1}$ ] = 3049 (w), 2948 (w), 2179 (w), 1716 (m), 1598 (w), 1577 (w), 1485 (w), 1471 (w), 1435 (m), 1396 (w), 1375 (m), 1344 (w), 1327 (m), 1305 (w), 1286 (s), 1217 (m), 1180 (w), 1151 (m), 1130 (w), 1118 (s), 1039 (m), 1008 (m), 958 (w), 937 (w), 920 (w), 813 (w), 786 (w), 744 (m), 677 (s), 623 (s), 555 (m), 495 (w), 447 (m), 428 (m).

**EI-MS (70 EV):**

$m/z$  (%) = 494 (5)  $[\text{M}-\text{Se}+\text{Li}]^+$ .

**1.6.12. Synthesis of anti-5<sup>N-Me</sup>**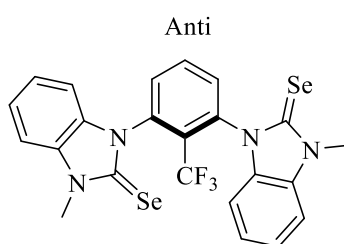

Chemical Formula:  $\text{C}_{23}\text{H}_{17}\text{F}_3\text{N}_4\text{Se}_2$

Exact Mass: 565.97357 g/mol

Elemental Analysis: C, 48.95; H, 3.04; F, 10.10; N, 9.93; Se, 27.98

*Anti-5<sup>N-Me</sup>* was synthesised according to the general selenation procedure B. For the reaction 1.13 g of *syn/anti-4<sup>N-Me</sup>* (1.68 mmol, 1 eq.), 0.32 g selenium powder (3.98 mmol, 2.5 eq.) and 1.30 g caesium carbonate (3.98 mmol, 2.5 eq.) were used. Purification by column chromatography with pentane:ethyl acetate (2:1→1:1→1:2→0:1) yielded 0.50 g *anti-5<sup>N-Me</sup>* (0.88 mmol, 52% applied to used amount of substance of *syn/anti* mixture and 87% applied to the *anti* amount of substance in the mixture) as colourless solid.

$R_f$  = 0.82 (Pentane:EtOAc 2:1)

**<sup>1</sup>H NMR (400 MHz, Chloroform-*d*):**

$\delta$  [ppm] = 8.00 (t,  $J$  = 8.0 Hz, 1H), 7.69 (d,  $J$  = 7.1 Hz, 2H), 7.33 (m, 6H), 7.16 (m, 2H), 3.99 (s, 6H).

**<sup>13</sup>C NMR (101 MHz, Chloroform-*d*):**

$\delta$  [ppm] = 168.72, 136.93, 134.78 (d,  $J$  = 14.7 Hz), 134.36, 133.73, 126.54 (q,  $J$  = 30.3 Hz), 124.33 (d,  $J$  = 18.2 Hz), 111.21, 109.53, 33.59.

**<sup>19</sup>F NMR (235 MHz, Chloroform-*d*):**

$\delta$  [ppm] = -57.37 (s, 3F)

**ATR-IR:**

$\tilde{\nu}$  [ $\text{cm}^{-1}$ ] = 3037 (w), 2929 (w), 1732 (w), 1598 (w), 1581 (w), 1469 (m), 1433 (m), 1375 (m), 1330(m), 1303 (w), 1278 (m), 1222 (m), 1180 (m), 1165 (w), 1139 (w), 1112 (w), 1041 (m), 1008 (m), 921 (w), 813 (w), 798 (w), 738 (vs), 680 (m), 663 (w), 553 (s), 516 (w), 453 (w), 426 (m).

**EI-MS (70 EV):**

$m/z$  (%) = 565.8 (5)  $[\text{M}]^+$ , 494 (3)  $[\text{M}-\text{Se}+\text{Li}]^+$ , 181 (10)  $[\text{C}_{14}\text{H}_{13}]^+$ .

**1.6.13. Synthesis of 8**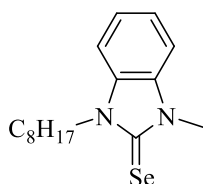

Chemical Formula:  $\text{C}_{16}\text{H}_{24}\text{N}_2\text{Se}$

Exact Mass: 324.11047 g/mol

Elemental Analysis: C, 59.43; H, 7.48; N, 8.66; Se, 24.42

**8** was synthesised according to the general selenation procedure A. For the reaction 2.00 g of **7<sup>H</sup>** (5.07 mmol, 1 eq.), 0.80 g selenium powder (10.2 mmol, 2.0 eq.) and 3.86 g DBU (3.78 ml, 25.4 mmol, 5.0 eq.) were used. After filtration / purification 1.56 g of **8** (4.81 mmol, 95%) was obtained as white powder.

$R_f$  = 0.90 (DCM)

**<sup>1</sup>H NMR (300 MHz, Chloroform-*d*):**

$\delta$  [ppm] = 7.13 (m, 4H), 4.27 (t,  $J = 7.62$  Hz, 2H), 3.74 (s, 3H), 1.67 (m, 2H), 1.23 (m, 10H), 0.73 (t,  $J = 7.41$ , 3H).

**<sup>13</sup>C NMR (100 MHz, Chloroform-*d*):**

$\delta$  [ppm] = 165.71, 132.75 (d,  $J = 51.4$  Hz), 122.81 (d,  $J = 3.0$  Hz), 109.15 (d,  $J = 4.7$  Hz), 46.31, 32.80, 29.13, 28.24 (d,  $J = 78.7$  Hz), 22.23, 13.75.

**ATR-IR:**

$\tilde{\nu}$  [ $\text{cm}^{-1}$ ] = 3024 (m), 2953 (w), 2916 (s), 2870 (w), 2848 (m), 1955 (w), 1911 (w), 1606 (m), 1483 (m), 1465 (m), 1438 (m), 1357 (m), 1336 (m), 1321 (m), 1284 (w), 1274 (w), 1226 (m), 1205 (w), 1188 (m), 1138 (m), 1116 (m), 1095 (w), 1074 (w), 1047 (w), 970 (w), 833 (w), 806 (w), 788 (m), 752 (m), 727 (m), 661 (m), 576 (m), 563 (m), 432 (m).

**EI-MS (70 EV):**

$m/z$  (%) = 324.1 (0.5)  $[M]^+$ , 322.1 (0.25)  $[M]^+$ , 243 (5)  $[M-Se]^+$ , 131 (5)  $[M-Se-C_8H_{17}]^+$ ,  
119 (5)  $[C_7H_7N_2]^+$ .

**1.6.14. Synthesis of *syn-6*<sup>N-Oct/Se-Me</sup>**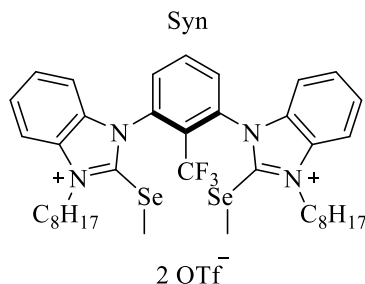

Chemical Formula: C<sub>41</sub>H<sub>51</sub>F<sub>9</sub>N<sub>4</sub>O<sub>6</sub>S<sub>2</sub>Se<sub>2</sub>

Exact Mass: 1090.14258 g/mol

Elemental Analysis: C, 45.22; H, 4.72; F, 15.70; N, 5.15; O, 8.82; S, 5.89; Se, 14.50

*Syn-6*<sup>N-Oct/Se-Me</sup> was synthesised according to the general methylation procedure for selenated compounds. For the reaction 0.30 g *syn-5*<sup>N-Oct</sup> (0.39 mmol, 1 eq.) and 0.19 g methyltrifluoromethanesulfonate (0.13 ml, 1.18 mmol, 3 eq.) were used. After purification 0.50 g *Syn-6*<sup>N-Oct/Se-Me</sup> (0.46 mmol, 90%) was obtained as slightly yellowish crystalline foam.

**<sup>1</sup>H NMR (300 MHz, Acetonitrile-*d*<sub>3</sub>):**

$\delta$  [ppm] = 8.39 (ddd,  $J$  = 8.8, 7.4, 0.7 Hz, 1H), 8.23 (dt,  $J$  = 8.1, 0.8 Hz, 2H), 8.05 (m, 2H),  
7.75 (m, 6H), 4.73 (td,  $J$  = 7.3, 2.7 Hz, 4H), 2.43 (s, 6H), 2.03 (t,  $J$  = 7.4 Hz, 4H),  
1.34 (m, 20H), 0.87 (t,  $J$  = 7.42 Hz, 6H).

**<sup>13</sup>C NMR (75 MHz, Acetonitrile-*d*<sub>3</sub>):**

$\delta$  [ppm] = 147.93, 138.36, 136.35, 135.87, 134.30 (d,  $J$  = 1.7 Hz), 133.27, 129.30 (d,  $J$  =  
30.1 Hz), 124.94 (q,  $J$  = 320.0 Hz), 114.66 (d,  $J$  = 36.8 Hz), 50.42, 32.39, 29.76  
(m), 27.14, 23.32, 14.35, 12.07.

**<sup>19</sup>F NMR (235 MHz, Chloroform-*d*):**

$\delta$  [ppm] = -56.33 (s, 3F), -79.28 (s, 6F).

**ATR-IR:**

$\tilde{\nu}$  [cm<sup>-1</sup>] = 3023 (w), 2927 (m), 2856 (m), 1718 (w), 1587 (w), 1473 (m), 1429 (m), 1406  
(w), 1361 (w), 1251 (vs), 1222 (m), 1139 (vs), 1028 (s), 931 (m), 844 (w), 802  
(m), 754 (vs), 634 (vs), 572 (s), 459 (w), 432 (m), 406 (w).



**ESI-MS:**

$m/z$  (+) = calc. 396.11 [M]<sup>2+</sup> and 792.23 [M]<sup>+</sup>; found 388.20 [M-CH<sub>3</sub>]<sup>2+</sup>, 414.99 [M+NH<sub>4</sub>]<sup>2+</sup> and 600.82 [M-SeC<sub>8</sub>H<sub>17</sub>]<sup>+</sup>.

$m/z$  (-) = calc. 148.95 [M]<sup>-</sup>; found 148.59 [M]<sup>-</sup>.

**CHNS:**

|       | C     | H    | N    | S    |
|-------|-------|------|------|------|
| calc. | 45.22 | 4.72 | 5.15 | 5.89 |
| found | 45.39 | 4.63 | 5.10 | 6.50 |

**1.6.15. Synthesis of anti-6<sup>N-Oct/Se-Me</sup>**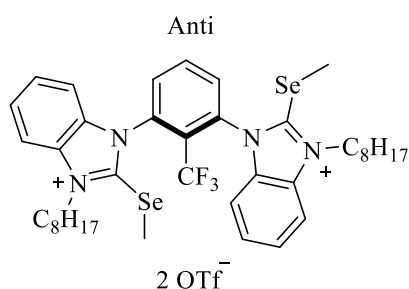

Chemical Formula: C<sub>41</sub>H<sub>51</sub>F<sub>9</sub>N<sub>4</sub>O<sub>6</sub>S<sub>2</sub>Se<sub>2</sub>

Exact Mass: 1090.14258 g/mol

Elemental Analysis: C, 45.22; H, 4.72; F, 15.70; N, 5.15; O, 8.82; S, 5.89; Se, 14.50

*Anti-6<sup>N-Oct/Se-Me</sup>* was synthesised according to the general methylation procedure for selenated compounds. For the reaction 0.79 g *anti-5<sup>N-Oct</sup>* (1.03 mmol, 1 eq.) and 0.68 g methyltrifluoromethanesulfonate (0.45 ml, 4.13 mmol, 4 eq.) were used. After purification 1.02 g *anti-6<sup>N-Oct/Se-Me</sup>* (0.94 mmol, 91%) was obtained as white solid.

**<sup>1</sup>H NMR (300 MHz, Acetonitrile-*d*<sub>3</sub>):**

$\delta$  [ppm] = 8.42 (ddd,  $J$  = 8.9, 7.3, 0.7 Hz, 1H), 8.28 (dt,  $J$  = 8.1, 0.8 Hz, 2H), 8.06 (m, 2H), 7.78 (m, 4H), 7.48 (m, 2H), 4.75 (td,  $J$  = 7.2, 2.4 Hz, 4H), 2.50 (s, 6H), 2.04 (p,  $J$  = 7.2 Hz, 4H), 1.32 (m, 20H), 0.86 (m, 6H).

**<sup>13</sup>C NMR (75 MHz, Acetonitrile-*d*<sub>3</sub>):**

$\delta$  [ppm] = 147.59, 138.49, 136.52, 135.91, 134.14, 133.30, 129.72, 128.51 (q,  $J$  = 30.6 Hz), 124.16 (q,  $J$  = 320 Hz), 115.75, 114.11, 50.46, 32.37, 30.06, 29.70 (d,  $J$  = 6.4 Hz), 27.14, 23.30, 14.35, 12.23.

**<sup>19</sup>F NMR (235 MHz, Chloroform-*d*):**

$\delta$  [ppm] = -56.43 (s, 3F), -79.22 (s, 6F).

**ATR-IR:**

$\tilde{\nu}$  [ $\text{cm}^{-1}$ ] = 3037 (w), 2927 (m), 2856 (m), 1737 (s), 1597 (w), 1475 (m), 1429 (m), 1373 (w), 1249 (s), 1222 (w), 1141 (s), 1028 (s), 927 (m), 850 (w), 806 (w), 754 (s), 634 (s), 572 (m), 516 (m), 432 (w).

**ESI-MS:**

$m/z$  (+) = calc. 396.11 [ $\text{M}$ ] $^{2+}$  and 792.23 [ $\text{M}$ ] $^{+}$ ; found 388.18 [ $\text{M}-\text{CH}_3$ ] $^{2+}$  and 415.02 [ $\text{M} + \text{NH}_4$ ] $^{2+}$ .

$m/z$  (-) = calc. 148.95 [ $\text{M}$ ] $^{-}$ ; found 148.57 [ $\text{M}$ ] $^{-}$ .

**CHNS:**

|       | C     | H    | N    | S    |
|-------|-------|------|------|------|
| calc. | 45.22 | 4.72 | 5.15 | 5.89 |
| found | 45.26 | 4.60 | 5.16 | 6.12 |

**1.6.16. Synthesis of *syn-6*<sup>N-Me/Se-Oct</sup>**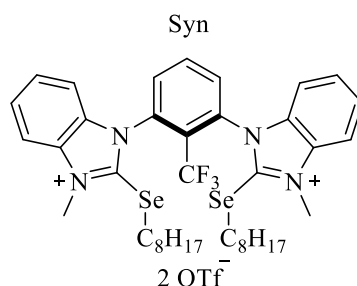

Chemical Formula:  $\text{C}_{41}\text{H}_{51}\text{F}_9\text{N}_4\text{O}_6\text{S}_2\text{Se}_2$

Exact Mass: 1090.14258 g/mol

Elemental Analysis: C, 45.22; H, 4.72; F, 15.70; N, 5.15; O, 8.82; S, 5.89; Se, 14.50

*Syn-6*<sup>N-Me/Se-Oct</sup> was synthesised according to the general octylation procedure for selenated compounds. For the reaction 0.09 g *syn-5*<sup>N-Me</sup> (0.15 mmol, 1 eq.) and 0.13 g octyltrifluoromethanesulfonate (0.11 ml, 0.46 mmol, 3 eq.) were used. After purification 0.13 g *syn-6*<sup>N-Me/Se-Oct</sup> (0.12 mmol, 80%) was obtained as slightly greyish solid.

**<sup>1</sup>H NMR (300 MHz, Acetonitrile-*d*<sub>3</sub>):**

$\delta$  [ppm] = 8.34 (t,  $J$  = 8.1 Hz, 1H), 8.12 (dd,  $J$  = 8.3, 4.4 Hz, 2H), 8.01 (m, 2H), 7.74 (m, 6H), 4.28 (s, 6H), 3.15 (t,  $J$  = 7.1 Hz, 4H), 1.68 (dd,  $J$  = 14.2, 7.0 Hz, 4H), 1.27 (m, 20H), 0.88 (td,  $J$  = 6.3, 3.2 Hz, 6H).

**<sup>13</sup>C NMR (101 MHz, Acetonitrile-*d*<sub>3</sub>):**

δ [ppm] = 148.27, 138.15, 136.44, 135.66, 134.43 (d, *J* = 17.5 Hz), 129.64, 129.06, 127.49 (d, *J* = 30.6 Hz), 123.80 (q, *J* = 320.41 Hz), 114.83, 114.34, 36.55, 33.62, 32.55, 31.42, 30.40 – 29.05 (t, *J* = 24.09 Hz), 23.38, 14.40.

**<sup>19</sup>F NMR (235 MHz, Acetonitrile-*d*<sub>3</sub>):**

δ [ppm] = -56.02 (s, 3F), -79.37 (s, 6F).

**ATR-IR:**

$\tilde{\nu}$  [cm<sup>-1</sup>] = 3058 (w), 2927 (m), 2856 (m), 1737 (m), 1587 (w), 1506 (w), 1477 (m), 1456 (w), 1404 (m), 1382 (w), 1354 (w), 1251 (vs), 1222 (m), 1141 (vs), 1028 (s), 852 (m), 812 (m), 754 (s), 684 (w), 634 (vs), 572 (m), 555 (w), 516 (s), 457 (w), 432 (m).

**ESI-MS:**

*m/z* (+) = calc. 396.11 [M]<sup>2+</sup> and 792.23 [M]<sup>+</sup>; found 339.08 [M-C<sub>8</sub>H<sub>17</sub>]<sup>2+</sup>, 437.03 [M+Potassium]<sup>2+</sup> and 678.75 [M-C<sub>8</sub>H<sub>17</sub>]<sup>+</sup>.

*m/z* (-) = calc. 148.95 [M]<sup>-</sup>; found 148.61 [M]<sup>-</sup>.

**CHNS:**

|       | C     | H    | N    | S    |
|-------|-------|------|------|------|
| calc. | 45.22 | 4.72 | 5.15 | 5.89 |
| found | 45.30 | 4.65 | 5.21 | 5.81 |

**1.6.17. Synthesis of anti-6<sup>N-Me/Se-Oct</sup>**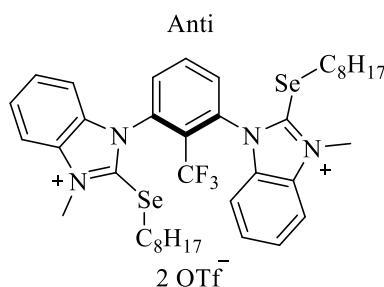

Chemical Formula: C<sub>41</sub>H<sub>51</sub>F<sub>9</sub>N<sub>4</sub>O<sub>6</sub>S<sub>2</sub>Se<sub>2</sub>

Exact Mass: 1090.14258 g/mol

Elemental Analysis: C, 45.22; H, 4.72; F, 15.70; N, 5.15; O, 8.82; S, 5.89; Se, 14.50

*Anti*-6<sup>N-Me/Se-Oct</sup> was synthesised according to the general methylation procedure for selenated compounds.

For the reaction 0.14 g *anti*-**5**<sup>N-Me</sup> (0.25 mmol, 1 eq.) and 0.21 g octyltrifluoromethanesulfonate (0.17 ml, 0.75 mmol, 3 eq.) were used. After purification 0.22 g *anti*-**6**<sup>N-Me/Se-Oct</sup> (0.2 mmol, 80%) was obtained as slightly greyish foam.

**<sup>1</sup>H NMR (300 MHz, Acetonitrile-*d*<sub>3</sub>):**

$\delta$  [ppm] = 8.38 (t,  $J$  = 8.1 Hz, 1H), 8.14 (d,  $J$  = 8.1 Hz, 2H), 8.03 (d,  $J$  = 8.1 Hz, 2H), 7.79 (dtd,  $J$  = 17.1, 7.4, 1.2 Hz, 4H), 7.45 (d,  $J$  = 8.1 Hz, 2H), 4.29 (s, 6H), 3.21 (t,  $J$  = 7.4 Hz, 4H), 1.71 (q,  $J$  = 7.3 Hz, 4H), 1.28 (m, 20H), 0.84 (t,  $J$  = 7.4 Hz, 6H).

**<sup>13</sup>C NMR (101 MHz, Acetonitrile-*d*<sub>3</sub>):**

$\delta$  [ppm] = 148.32, 138.35, 136.65, 134.35 (d,  $J$  = 7.6 Hz), 129.40 (d,  $J$  = 61.4 Hz), 123.72 (q,  $J$  = 320.01 Hz), 114.42 (d,  $J$  = 113.6 Hz), 71.36, 36.57, 33.76, 32.47, 31.29, 30.31 (t,  $J$  = 28.59 Hz), 23.32, 14.36.

**<sup>19</sup>F NMR (235 MHz, Acetonitrile-*d*<sub>3</sub>):**

$\delta$  [ppm] = -56.08 (s, 3F), -79.28 (s, 6F).

**ATR-IR:**

$\tilde{\nu}$  [cm<sup>-1</sup>] = 3068 (w), 2927 (m), 2856 (m), 1587 (w), 1506 (w), 1477 (m), 1458 (w), 1404 (m), 1384 (w), 1354 (w), 1253 (vs), 1222 (m), 1143 (vs), 1028 (s), 1012 (w), 852 (m), 812 (m), 754 (vs), 684 (m), 634 (vs), 572 (m), 555 (w), 516 (s), 457 (w), 432 (m).

**ESI-MS:**

$m/z$  (+) = calc. 396.11 [M]<sup>2+</sup> and 792.23 [M]<sup>+</sup>; found 679.06 [M-C<sub>8</sub>H<sub>17</sub>]<sup>+</sup>.

$m/z$  (-) = calc. 148.95 [M]<sup>-</sup>; found 148.61 [M]<sup>-</sup>.

**CHNS:**

|       | C     | H    | N    | S    |
|-------|-------|------|------|------|
| calc. | 45.22 | 4.72 | 5.15 | 5.89 |
| found | 44.87 | 4.63 | 5.11 | 6.43 |

### 1.6.18. Synthesis of *syn-6*<sup>N-Oct/Se-iPr</sup>

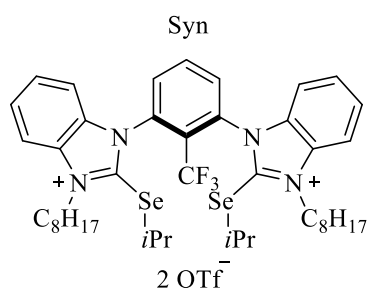

Chemical Formula: C<sub>45</sub>H<sub>59</sub>F<sub>9</sub>N<sub>4</sub>O<sub>6</sub>S<sub>2</sub>Se<sub>2</sub>

Exact Mass: 1146.20518 g/mol

Elemental Analysis: C, 47.20; H, 5.19; F, 14.93; N, 4.89; O, 8.38; S, 5.60; Se, 13.79

*Syn-6*<sup>N-Oct/Se-iPr</sup> was synthesised according to the general *iso*-propylation procedure for selenated compounds. For the reaction *g syn-5*<sup>N-iPr</sup> (mmol, 1 eq.) and *g iso*-propyltrifluoromethanesulfonate (ml, mmol, eq.) were used. After purification *g syn-6*<sup>N-Oct/Se-iPr</sup> (mmol, 95%) was obtained as slightly beige crystalline foam.

#### <sup>1</sup>H NMR (300 MHz, Acetonitrile-*d*<sub>3</sub>):

δ [ppm] = 8.44 (t *J* = 7.5 Hz, 1H), 8.26 (d, *J* = 7.93 Hz, 2H),  
8.12 (dd, *J* = 7.29 Hz, 1.52 Hz, 2H), 7.80 (m, 6H), 4.80 (m, 4H),  
3.87 (p, *J* = 6.8 Hz, 2H), 2.05 (m, 4H), 1.58 (d, *J* = 6.8 Hz, 6H),  
1.44 (d, *J* = 6.8 Hz, 6H), 1.27 (m, 20H), 0.89 (m, 6H).

#### <sup>13</sup>C NMR (75 MHz, Acetonitrile-*d*<sub>3</sub>):

δ [ppm] = 146.93, 138.36, 136.39, 136.11, 134.39 (d, *J* = 1.8 Hz), 133.28, 129.56 (d, *J* = 49.0 Hz), 124.10 (q, *J* = 320 Hz), 114.95 (d, *J* = 35.8 Hz), 50.59, 45.09, 32.33, 30.05, 29.65 (d, *J* = 7.7 Hz), 26.98, 25.34 (d, *J* = 6.5 Hz), 23.30, 14.35.

#### <sup>19</sup>F NMR (235 MHz, Chloroform-*d*):

δ [ppm] = -56.19 (s, 3F), -79.38 (s, 6F).

#### ATR-IR:

$\tilde{\nu}$  [cm<sup>-1</sup>] = 3070 (w), 2927 (m), 2856 (m), 1598 (w), 1473 (m), 1427 (m), 1400 (w),  
1359 (w), 1255 (vs), 1222 (vs), 1139 (vs), 1028 (vs), 873 (w), 844 (w), 802 (w),  
756 (s), 684 (w), 667 (w), 634 (vs), 572 (m), 514 (s), 457 (w), 433 (w), 412 (w).

**ESI-MS:**

$m/z$  (+) = calc. 424.15 [M]<sup>2+</sup> and 848.30 [M]<sup>+</sup>; found 381.05 [M-(iPr)<sub>2</sub>]<sup>2+</sup>  
and 804.85 [M-iPr]<sup>+</sup>.

$m/z$  (-) = calc. 148.95 [M]<sup>-</sup>; found 148.50 [M]<sup>-</sup>.

**1.6.19. Synthesis of anti-6<sup>N-Oct/Se-iPr</sup>**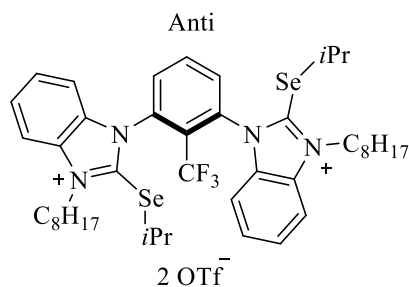

Chemical Formula: C<sub>45</sub>H<sub>59</sub>F<sub>9</sub>N<sub>4</sub>O<sub>6</sub>S<sub>2</sub>Se<sub>2</sub>

Exact Mass: 1146.20518 g/mol

Elemental Analysis: C, 47.20; H, 5.19; F, 14.93; N, 4.89; O, 8.38; S, 5.60; Se, 13.79

*Anti-6<sup>N-Oct/Se-Me</sup>* was synthesised according to the general *iso*-propylation procedure for selenated compounds. For the reaction g *anti-5<sup>N-Oct</sup>* (mmol, 1 eq.) and g *iso*-propyltrifluoromethane-sulfonate (ml, mmol, eq.) were used. After purification g *anti-6<sup>N-Oct/Se-Me</sup>* (mmol, 90%) was obtained as slightly greenish, sticky oil.

**<sup>1</sup>H NMR (300 MHz, Acetonitrile-*d*<sub>3</sub>):**

$\delta$  [ppm] = 8.45 (t,  $J$  = 8.5 Hz, 1H), 8.27 (d,  $J$  = 7.95 Hz, 2H),  
8.12 (dd,  $J$  = 7.45 Hz, 1.99 Hz, 2H), 7.85 (m, 4H),  
7.50 (dd,  $J$  = 7.45 Hz, 1.99 Hz, 2H), 4.83 (td,  $J$  = 7.8, 4.2 Hz, 4H),  
3.93 (p,  $J$  = 6.8 Hz, 2H), 2.08 (m, 4H), 1.59 (d,  $J$  = 6.8 Hz, 6H),  
1.50 (d,  $J$  = 6.8 Hz, 6H), 1.22 (m, 20H), 0.88 (td,  $J$  = 7.2, 5.2 Hz, 6H).

**<sup>13</sup>C NMR (75 MHz, Acetonitrile-*d*<sub>3</sub>):**

$\delta$  [ppm] = 146.97, 138.50, 136.70, 136.06, 134.18 (d,  $J$  = 1.7 Hz), 133.33, 129.63 (d,  $J$  = 58.0 Hz), 121.75 (d,  $J$  = 319.8 Hz), 114.77 (d,  $J$  = 90.7 Hz), 50.63, 45.24, 32.32, 30.02, 29.64 (d,  $J$  = 6.6 Hz), 27.00, 25.25, 23.28, 14.33.

**<sup>19</sup>F NMR (235 MHz, Chloroform-*d*):**

$\delta$  [ppm] = -56.43 (s, 3F), -79.22 (s, 6F).

**ATR-IR:**

$\tilde{\nu}$  [ $\text{cm}^{-1}$ ] = 3076 (w), 2927 (m), 2856 (m), 1597 (w), 1585 (w), 1473 (m), 1427 (m),  
1390 (w), 1373 (w), 1352 (w), 1255 (vs), 1222 (vs), 1139 (vs), 1028 (vs), 873 (w),  
850 (w), 806 (w), 75 (s), 686 (w), 634 (vs), 572 (s); 514 (s), 459 (w), 432 (w),  
412 (w).

**ESI-MS:**

$m/z$  (+) = calc. 424.15  $[\text{M}]^{2+}$  and 848.30  $[\text{M}]^+$ ; found 380.05  $[\text{M}-(i\text{Pr})_2]^{2+}$   
and 804.87  $[\text{M}-i\text{Pr}]^+$ .

$m/z$  (-) = calc. 148.95  $[\text{M}]^-$ ; found 148.55  $[\text{M}]^-$ .

**1.6.20. Synthesis of *syn-6*<sup>N-Me/Se-Me</sup>**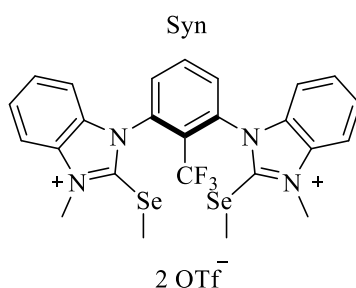

Chemical Formula:  $\text{C}_{27}\text{H}_{23}\text{F}_9\text{N}_4\text{O}_6\text{S}_2\text{Se}_2$

Exact Mass: 893.92348 g/mol

Elemental Analysis: C, 36.33; H, 2.60; F, 19.16; N, 6.28; O, 10.76; S, 7.18; Se, 17.69

*Syn-6*<sup>N-Me/Se-Me</sup> was synthesised according to the general methylation procedure for selenated compounds. For the reaction 0.03 g *syn-5*<sup>N-Me</sup> (0.05 mmol, 1 eq.) and 0.16 g methyltrifluoromethanesulfonate (0.02 ml, 0.16 mmol, 3 eq.) were used. After purification 0.04 g *syn-6*<sup>N-Me/Se-Me</sup> (0.04 mmol, 90%) was obtained as slightly beige solid.

**<sup>1</sup>H NMR (300 MHz, Acetonitrile-*d*<sub>3</sub>):**

$\delta$  [ppm] = 8.35 (t,  $J$  = 8.1 Hz, 1H), 8.12 (d,  $J$  = 8.1 Hz, 2H), 8.02 (m, 2H),  
7.78 (dddd,  $J$  = 13.1, 8.5, 6.1, 1.4 Hz, 4H), 7.67 (d,  $J$  = 7.6 Hz, 2H),  
4.27 (s, 6H), 2.50 (s, 5H).

**<sup>13</sup>C NMR (101 MHz, Acetonitrile-*d*<sub>3</sub>):**

$\delta$  [ppm] = 148.94, 138.32, 136.46, 135.52, 134.32 (d,  $J$  = 14.2 Hz), 129.26 (d,  $J$  = 54.5 Hz),  
123.60 (q,  $J$  = 320.40 Hz), 114.45 (d,  $J$  = 48.9 Hz), 36.31, 11.37.

**<sup>19</sup>F NMR (235 MHz, Acetonitrile-*d*<sub>3</sub>):**

$\delta$  [ppm] = -56.22 (s, 3F), -79.32 (s, 6F).

**ATR-IR:**

$\tilde{\nu}$  [cm<sup>-1</sup>] = 3062 (w), 1591 (m), 1506 (m), 1475 (s), 1404 (m), 1361 (w), 1255 (vs), 1224 (s), 1190 (w), 1141 (vs), 1043 (w), 1028 (vs), 1014 (m), 939 (m), 842 (m), 810 (m), 752 (vs), 686 (w), 634 (vs), 572 (m), 561 (w), 516 (s), 464 (w), 433 (w), 405 (w).

**ESI-MS:**

$m/z$  (+) = calc. 298.00 [M]<sup>2+</sup> and 596.01 [M]<sup>+</sup>; found 580.67 [M-CH<sub>3</sub>]<sup>+</sup>.

$m/z$  (-) = calc. 148.95 [M]<sup>-</sup>; found 148.63 [M]<sup>-</sup>.

**1.6.21. Synthesis of anti-6<sup>N-Me/Se-Me</sup>**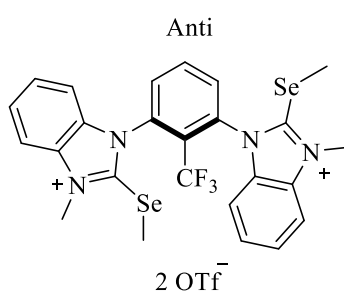

Chemical Formula: C<sub>27</sub>H<sub>23</sub>F<sub>9</sub>N<sub>4</sub>O<sub>6</sub>S<sub>2</sub>Se<sub>2</sub>

Exact Mass: 893.92348 g/mol

Elemental Analysis: C, 36.33; H, 2.60; F, 19.16; N, 6.28; O, 10.76; S, 7.18; Se, 17.69

*Anti-6<sup>N-Me/Se-Me</sup>* was synthesised according to the general procedure for selenated compounds. For the reaction 0.03 g *anti-5<sup>N-Me</sup>* (0.05 mmol, 1 eq.) and 0.16 g methyltrifluoromethanesulfonate (0.02 ml, 0.16 mmol, 3 eq.) were used. After purification 0.04 g *anti-6<sup>N-Me/Se-Me</sup>* (0.04 mmol, 90%) was obtained as slightly beige solid.

**<sup>1</sup>H NMR (300 MHz, Acetonitrile-*d*<sub>3</sub>):**

$\delta$  [ppm] = 8.35 (q,  $J$  = 7.1, 6.1 Hz, 1H), 8.13 (d,  $J$  = 8.1 Hz, 2H), 8.01 (d,  $J$  = 8.3 Hz, 2H), 7.77 (m, 4H), 7.46 (d,  $J$  = 8.3 Hz, 2H), 4.28 (s, 6H), 2.53 (s, 6H).

**<sup>13</sup>C NMR (101 MHz, Acetonitrile-*d*<sub>3</sub>):**

$\delta$  [ppm] = 148.69, 138.42, 136.53, 135.51, 134.30, 129.64 (d,  $J$  = 58.61 Hz), 123.60 (q,  $J$  = 320.40 Hz), 114.80, 113.93, 36.34, 11.53.

**<sup>19</sup>F NMR (235 MHz, Acetonitrile-*d*<sub>3</sub>):**

$\delta$  [ppm] = -56.36 (s, 3F), -79.41 (s, 6F).



**ATR-IR:**

$\tilde{\nu}$  [cm<sup>-1</sup>] = 3080 (w), 2960 (w), 1597 (w), 1585 (w), 1508 (w), 1479 (m), 1458 (m), 1404 (m), 1384 (w), 1354 (w), 1213 (m), 1157 (w), 1139 (w), 1109 (m), 1022 (m), 858 (w), 850 (w), 806 (vs), 754 (s), 684 (w), 634 (vs), 570 (m), 555 (w), 513 (s), 459 (w), 432 (w).

**ESI-MS:**

$m/z$  (+) = calc. 298.00 [M]<sup>2+</sup> and 596.01 [M]<sup>+</sup>; found, 284.86 [M-CH<sub>3</sub>]<sup>2+</sup> and 580.84 [M-CH<sub>3</sub>]<sup>+</sup>.

$m/z$  (-) = calc. 148.95 [M]<sup>-</sup>; found 148.62 [M]<sup>-</sup>.

**CHNS:**

|       | C     | H    | N    | S    |
|-------|-------|------|------|------|
| calc. | 36.33 | 2.60 | 6.28 | 7.18 |
| found | 36.43 | 2.63 | 6.00 | 8.00 |

**1.6.22. Synthesis of 9<sup>Se-Me</sup>**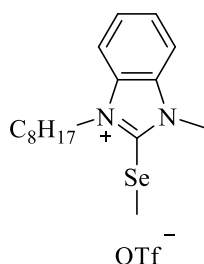

Chemical Formula: C<sub>18</sub>H<sub>27</sub>F<sub>3</sub>N<sub>2</sub>O<sub>3</sub>SSe

Exact Mass: 488.08597 g/mol

Elemental Analysis: C, 44.35; H, 5.58; F, 11.69; N, 5.75; O, 9.85; S, 6.58; Se, 16.20

**9<sup>Se-Me</sup>** was synthesised according to the general methylation procedure for selenated compounds. For the reaction 0.50 g **8** (1.55 mmol, 1 eq.) and 0.51 g methyltrifluoromethanesulfonate (0.34 ml, 3.09 mmol, 2.0 eq.) were used. After purification 0.677 g **9<sup>Se-Me</sup>** (1.39 mmol, 90%) was obtained as white solid.

**<sup>1</sup>H NMR (250 MHz, Chloroform-*d*):**

$\delta$  [ppm] = 7.71 (m, 4H), 4.62 (dd,  $J$  = 8.6, 6.8 Hz, 2H), 4.25 (s, 3H), 2.66 (s, 3H), 1.91 (t,  $J$  = 7.4 Hz, 2H), 1.39 (m, 10H), 0.86 (t,  $J$  = 7.2 Hz, 3H).

**<sup>13</sup>C NMR (75 MHz, Acetonitrile-*d*<sub>3</sub>):**

$\delta$  [ppm] = 146.37, 134.50, 133.33, 128.11 (d,  $J$  = 1.3 Hz), 122.20 (d,  $J$  = 320.9 Hz), 114.23, 49.47, 35.37, 32.45, 30.39, 29.72 (d,  $J$  = 4.8 Hz), 27.19, 23.33, 14.36, 11.13.

**<sup>19</sup>F NMR (235 MHz, Chloroform-*d*):**

$\delta$  [ppm] = -78.46 (s, 3F).

**ATR-IR:**

$\tilde{\nu}$  [cm<sup>-1</sup>] = 3025 (w), 2926 (m), 2856 (m), 1739 (m), 1610 (w), 1558 (w), 1504 (w), 1475 (m), 1456 (w), 1415 (w), 1398 (w), 1377 (w), 1352 (m), 1255 (m), 1222 (m), 1145 (vs), 1029 (vs), 927 (s), 804 (s), 773 (m), 754 (s), 634 (vs), 588 (w), 570 (m), 516 (s), 437 (m), 405 (w).

**ESI-MS:**

$m/z$  (+) = calc. 339.13 [M]<sup>+</sup>; found 338.91 [M]<sup>+</sup>.

$m/z$  (-) = calc. 148.95 [M]<sup>-</sup>; found 148.62 [M]<sup>-</sup>.

**CHNS:**

|       | C     | H    | N    | S    |
|-------|-------|------|------|------|
| calc. | 44.35 | 5.58 | 5.75 | 6.58 |
| found | 44.17 | 5.39 | 5.81 | 6.58 |

**1.6.23. Synthesis of **9**<sup>Se-Oct</sup>**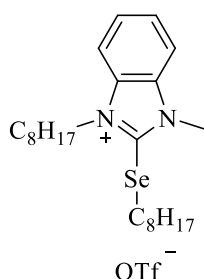

Chemical Formula: C<sub>25</sub>H<sub>41</sub>F<sub>3</sub>N<sub>2</sub>O<sub>3</sub>SSe

Exact Mass: 586.19552 g/mol

Elemental Analysis: C, 51.27; H, 7.06; F, 9.73; N, 4.78; O, 8.20; S, 5.47; Se, 13.48

**9**<sup>Se-Oct</sup> was synthesised according to the general octylation procedure for selenated compounds. For the reaction 0.90 g **8** (3.29 mmol, 1 eq.) and 2.73 g octyltrifluoromethanesulfonate (2.27 ml, 9.88 mmol, 3 eq.) were used. After purification 0.58 g **9**<sup>Se-Oct</sup> (1.08 mmol, 33%) was obtained sticky, slightly yellowish solid.

**<sup>1</sup>H NMR (300 MHz, Chloroform-*d*):**

$\delta$  [ppm] = 7.83 (m, 1H), 7.64 (m, 3H), 4.61 (dd,  $J$  = 8.7, 6.7 Hz, 2H), 3.30 (t,  $J$  = 7.4 Hz, 2H), 1.84 (dq,  $J$  = 29.3, 7.3 Hz, 4H), 1.33 (m, 20H), 0.87 (t,  $J$  = 7.5 Hz, 6H).

**<sup>13</sup>C NMR (75 MHz, Chloroform-*d*):**

$\delta$  [ppm] = 146.38, 134.50, 133.33, 128.10 (d,  $J = 1.3$  Hz), 122.18 (d,  $J = 321.0$  Hz), 114.23, 49.47, 35.37, 32.45, 30.40, 29.75 (d,  $J = 4.2$  Hz), 27.19, 23.33, 14.37, 11.13.

**<sup>19</sup>F NMR (235 MHz, Chloroform-*d*):**

$\delta$  [ppm] = -78.47 (s, 3F).

**ATR-IR:**

$\tilde{\nu}$  [cm<sup>-1</sup>] = 3029 (w), 2956 (m), 2924 (s), 2856 (m), 1500 (m), 1475 (w), 1413 (w), 1377 (w), 1352 (w), 1253 (vs), 1222 (m), 1155 (vs), 1029 (s), 806 (w), 767 (s), 723 (w), 636 (s), 572 (w), 555 (w), 516 (m), 433 (w).

**CHNS:**

|       | C     | H    | N    | S    |
|-------|-------|------|------|------|
| calc. | 51.27 | 7.06 | 4.78 | 5.47 |
| found | 49.38 | 6.64 | 4.71 | 6.58 |

**1.6.24. Synthesis of **9**<sup>Se-*i*Pr</sup>**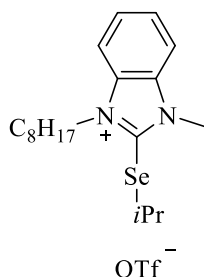

Chemical Formula: C<sub>20</sub>H<sub>31</sub>F<sub>3</sub>N<sub>2</sub>O<sub>3</sub>SSe

Exact Mass: 516.11727 g/mol

Elemental Analysis: C, 46.60; H, 6.06; F, 11.06; N, 5.43; O, 9.31; S, 6.22; Se, 15.32

**9**<sup>Se-*i*Pr</sup> was synthesised according to the general *iso*-propylation procedure for selenated compounds. For the reaction 0.14 g **8** (0.64 mmol, 1 eq.) and 0.16 ml *iso*-propyltrifluoromethane-sulfonate (0.93 mmol, 2 eq.) were used. After purification 0.17 g **9**<sup>Se-*i*Pr</sup> (0.42 mmol, 91%) was obtained as sticky, beige oil.

**<sup>1</sup>H NMR (300 MHz, MeCN-*d*<sub>3</sub>):**

$\delta$  [ppm] = 7.90 (m, 2H), 7.69 (m, 2H), 4.63 (t,  $J = 7.5$  Hz, 2H), 4.17 (s, 3H), 3.97 (p,  $J = 6.8$  Hz, 1H), 1.86 (m, 2H), 1.50 (d,  $J = 6.8$  Hz, 6H), 1.22 (m, 10H), 0.88 (m, 3H).

**<sup>13</sup>C NMR (75 MHz, MeCN-*d*<sub>3</sub>):**

δ [ppm] = 145.57, 134.59, 133.44, 128.28, 121.62 (d, *J* = 320 Hz), 114.48 (d, *J* = 4.6 Hz), 49.55, 43.11, 35.75, 32.45, 30.35, 29.73 (d, *J* = 4.6 Hz), 27.15 24.96, 23.33, 14.37.

**<sup>19</sup>F NMR (235 MHz, MeCN-*d*<sub>3</sub>):**

δ [ppm] = -78.47 (s, 3F).

**ATR-IR:**

$\tilde{\nu}$  [cm<sup>-1</sup>] = 3071 (w), 2927 (w), 2858 (w), 1502 (w), 1473 (m), 1413 (w), 1373 (w), 1284 (s), 1222 (vs), 1166 (vs), 1026 (vs), 873 (w), 804 (w), 748 (m), 636 (s), 572 (w), 514 (w).

**ESI-MS:**

*m/z* (+) = calc. 367.16 [M]<sup>+</sup>; found 366.72 [M]<sup>+</sup>.

*m/z* (-) = calc. 148.95 [M]<sup>-</sup>; found 148.51 [M]<sup>-</sup>.

## 2. *Catalysis Experiments – Benchmark reaction*

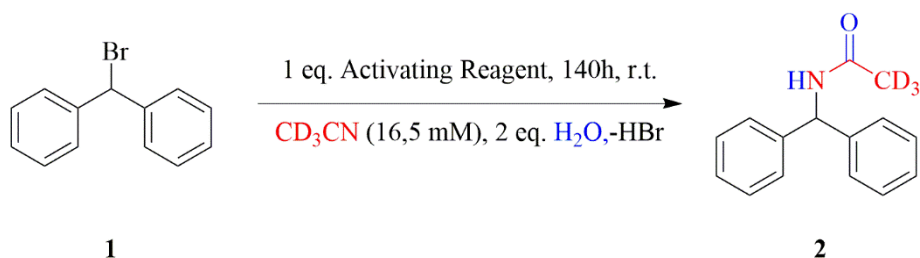**Scheme 1: Benchmark reaction.**

To a NMR tube the respective donor (10.0 μmol, 1.eq or 2.eq) was added followed by evacuation for 45 min. and flushing with argon. Under an argon atmosphere 0.6 ml of a benzhydryl bromide stock solution (16.5 mM, 1eq.; 0.36μL water, 2 eq.) were added and it was mixed for 1 min. All experiments were started simultaneously and the yield was determined by <sup>1</sup>H NMR spectroscopy after approximately 6, 12 , 18, 27, 30, 36, 45, 57, 69, 81, 93, 105, 117, 129 and 140h of reaction time.

### 3. *Titration Experiments*

For pipetting *Hamilton*®-syringes were used. All experiments were conducted at ambient temperature and in *Norell*® 502 NMR-Tubes. 5.7 mg (5  $\mu\text{mol}$ ) of the Host (**XX**) were dissolved in deuterated acetonitrile and diluted in a volumetric flask to give 1 ml of a 5 mM solution. A stock-solution of tetraoctylammonium bromide (ChB-Acceptor/Guest) was prepared in 0.2 M concentration by dissolving 109.4 mg (200  $\mu\text{mol}$ ) in deuterated acetonitrile in a 1 ml volumetric flask. For every measured point a NMR-tube was charged with 100  $\mu\text{l}$  of the host solution, 400  $\mu\text{l}$  of  $\text{d}_3\text{-MeCN}$  and corresponding amounts of the guest solution were added sequentially. The NMR-spectra were measured with a *Bruker* AVIII-300.  $^1\text{H}$ -Spectra were measured with 16 scans and the host to guest ratio was checked by integration of the signals and corrected if necessary.

For the determination of the binding constants the shift of the C2-proton of the isopropyl group bound to the selenium atoms was observed relative to the signal of the solvent. The measured shifts ( $\Delta\text{ppm}$ ) were plotted against the guest-equivalents and the resulting curve was fitted.<sup>[2]</sup> For the calculations of the binding constants (K) a 1:1 stoichiometry was assumed. No decomposition of the host / ChB was observed in  $^1\text{H}$  NMR and  $^{19}\text{F}$  NMR spectra.

**Figure 1:** Titration Plot of  $\text{syn-}^6\text{N-Oct/Se-iPr}$  (host) in  $\text{MeCN-}d_3$  and  $\text{N}(\text{Oct})_4\text{Br}$  as guest molecule.

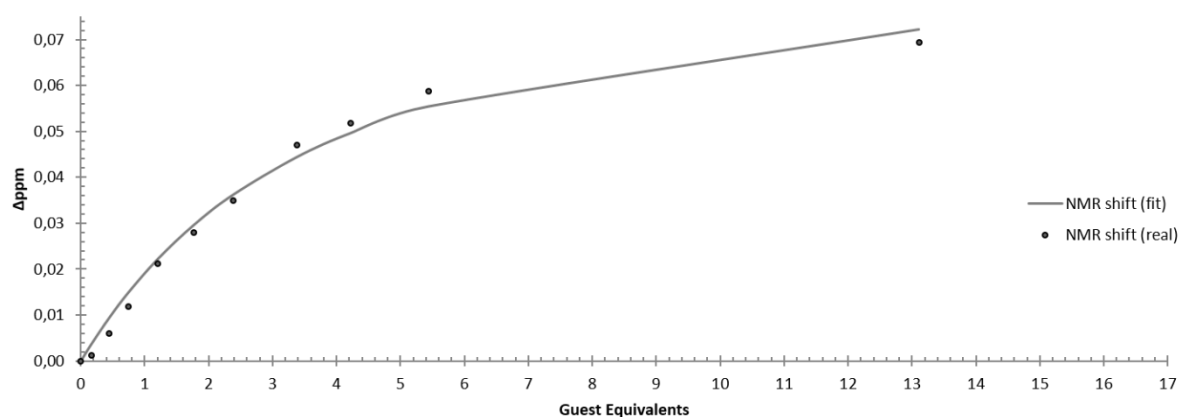

## 4. Determination $k_{rel}$ values

$K_{rel}$  was determined by a linear fit from the kinetic plot. To this end, the gradient between zero hours and 12h and the corresponding yield of **2** was determined for selected curves. The blank reaction was chosen as standard gradient with a value of  $k_{rel} = 1$ . All other  $k_{rel}$  values were referred to this value. For the linear fit a straight line was (see plot at the end) pasted. The determined initial rates are:

| Compound                                       | $k_{rel}$ |
|------------------------------------------------|-----------|
| Blank                                          | 1         |
| <i>syn</i> - <b>10</b> <sup>Br</sup>           | 9         |
| <i>anti</i> - <b>6</b> <sup>N-Oct/Se-iPr</sup> | 23        |
| <i>syn</i> - <b>6</b> <sup>N-Oct/Se-iPr</sup>  | 34        |

**Figure 2:** Plot with linear fit (left) and zoom into the fit (right).

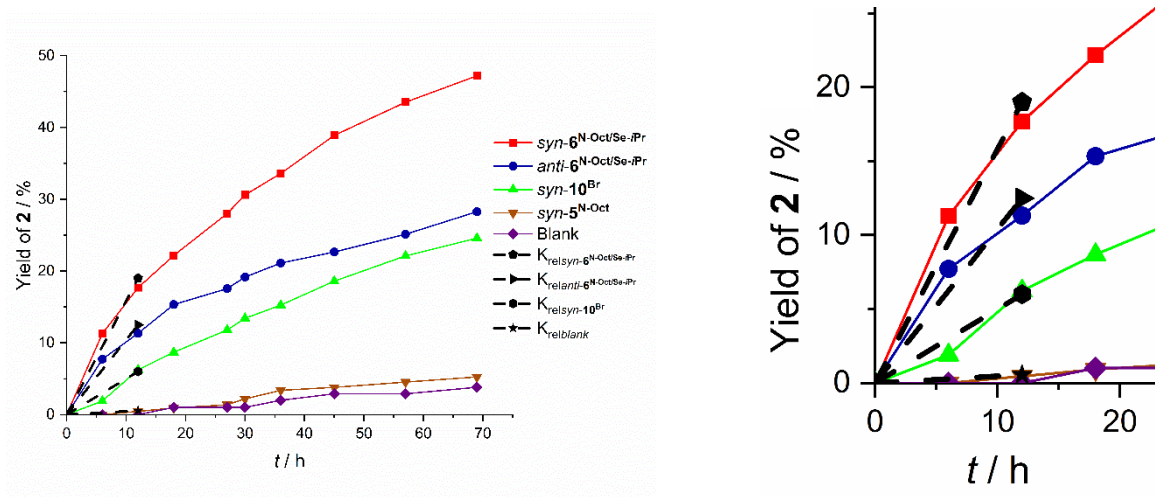

## 5. DFT Calculations

Orientating DFT calculations were performed to demonstrate the feasibility of a bidentate coordination of a bis(benzimidazolium)-based model chalcogen bond donor (with methyl groups on nitrogen and selenium) to bromide. To this end, the M06-2X density functional<sup>[3]</sup> was employed with the Gaussian09 suite of programs,<sup>[4]</sup> in combination with a triple-zeta TZVPP basis set.<sup>[5]</sup> The optimized structure was confirmed as a minimum by the absence of imaginary frequencies. The complex is shown below (plot by CYLview).<sup>[6]</sup>

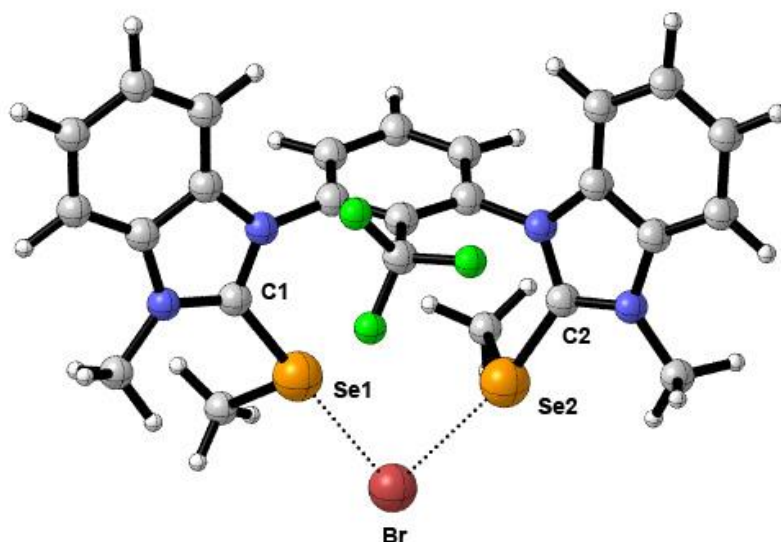

**Figure 3: Calculated chalcogen bonding complex**

Selected bond distances (Å) and angles (°):

Se1-Br = 2.92

C1-Se1-Br = 179

Se2-Br = 3.08

C2-Se2-Br = 169

Se1-Br-Se2 = 75

Coordinates:

|   |             |             |            |
|---|-------------|-------------|------------|
| H | -2.05201800 | -1.45633600 | 2.91997400 |
| C | -1.08987000 | -1.39301200 | 2.43001500 |

|    |             |             |             |
|----|-------------|-------------|-------------|
| C  | 1.33334500  | -1.09523800 | 1.12867000  |
| C  | -1.04521500 | -1.27109700 | 1.05168200  |
| C  | 0.08802600  | -1.41137200 | 3.15975200  |
| C  | 1.29554000  | -1.22875300 | 2.50932600  |
| C  | 0.16895800  | -1.19241500 | 0.36668600  |
| H  | 0.06016800  | -1.51478700 | 4.23485100  |
| H  | 2.22209600  | -1.15902100 | 3.06354400  |
| N  | 2.59152800  | -0.80819400 | 0.52131600  |
| N  | -2.28463800 | -1.17703300 | 0.34544200  |
| C  | -2.84133200 | -0.00794900 | -0.06205500 |
| N  | -4.05147400 | -0.28653500 | -0.55582000 |
| C  | -3.17888200 | -2.22456700 | 0.12967900  |
| C  | -4.31006500 | -1.65064100 | -0.44090800 |
| C  | 2.91057800  | 0.36758200  | -0.07247300 |
| N  | 4.09418300  | 0.21398300  | -0.67273200 |
| C  | 3.60465200  | -1.73717100 | 0.29563000  |
| C  | 4.55834000  | -1.08333300 | -0.47602400 |
| C  | -4.94089100 | 0.66628200  | -1.20286400 |
| H  | -5.70985700 | 1.00430700  | -0.51093100 |
| H  | -4.35171200 | 1.51120800  | -1.54768100 |
| H  | -5.40464500 | 0.17856700  | -2.05677200 |
| C  | 4.83487000  | 1.23203900  | -1.40501000 |
| H  | 4.79673200  | 1.01794400  | -2.47117100 |
| H  | 4.38924400  | 2.20175800  | -1.20684200 |
| H  | 5.86766500  | 1.22429300  | -1.06413000 |
| C  | 1.47316900  | 2.00657300  | 1.77125800  |
| H  | 0.50226100  | 1.56625200  | 1.98013700  |
| H  | 2.27849500  | 1.49806400  | 2.29299800  |
| H  | 1.45763500  | 3.06348800  | 2.01080100  |
| C  | -3.32168300 | 2.73777800  | 0.72594800  |
| H  | -3.76432800 | 3.34787700  | -0.05400600 |
| H  | -4.05435400 | 2.08516900  | 1.19153500  |
| H  | -2.84938800 | 3.37720400  | 1.46347200  |
| Se | 1.80083600  | 1.95076800  | -0.16149400 |
| Se | -1.85716600 | 1.67748800  | -0.03065500 |
| Br | -0.32870700 | 4.16356500  | 0.01170100  |



|   |             |             |             |
|---|-------------|-------------|-------------|
| C | -5.41489300 | -2.41432800 | -0.79053000 |
| C | -3.08726100 | -3.58569400 | 0.37481700  |
| C | 3.74893800  | -3.06248600 | 0.67686200  |
| C | 5.71616900  | -1.72105900 | -0.89940400 |
| H | -6.29825400 | -1.97366300 | -1.23003200 |
| H | -2.19963800 | -4.02523700 | 0.80761900  |
| H | 6.45817700  | -1.21688800 | -1.50182100 |
| H | 2.99897200  | -3.56953600 | 1.26750500  |
| C | -5.33085700 | -3.77301700 | -0.54322800 |
| C | -4.18879100 | -4.34819400 | 0.02904000  |
| C | 4.90223200  | -3.70023300 | 0.25561200  |
| C | 5.86887700  | -3.04111100 | -0.51555500 |
| H | -6.16721400 | -4.40782900 | -0.79842200 |
| H | -4.16792000 | -5.41473300 | 0.20143400  |
| H | 6.75413900  | -3.58013500 | -0.82101600 |
| H | 5.06197300  | -4.73424700 | 0.52585200  |
| C | 0.15474500  | -1.33623300 | -1.14874900 |
| F | -0.53568300 | -2.43810400 | -1.46691400 |
| F | 1.37244500  | -1.48007700 | -1.66756400 |
| F | -0.42650000 | -0.31502700 | -1.76884000 |

## 6. Selected NMR Spectra

Figure 4:  $^1\text{H}$  NMR stacked plot of BHB reaction with  $\text{syn-6}^{\text{N-Oct/Se-iPr}}$  as activating agent in  $\text{MeCN-d}_3$ .

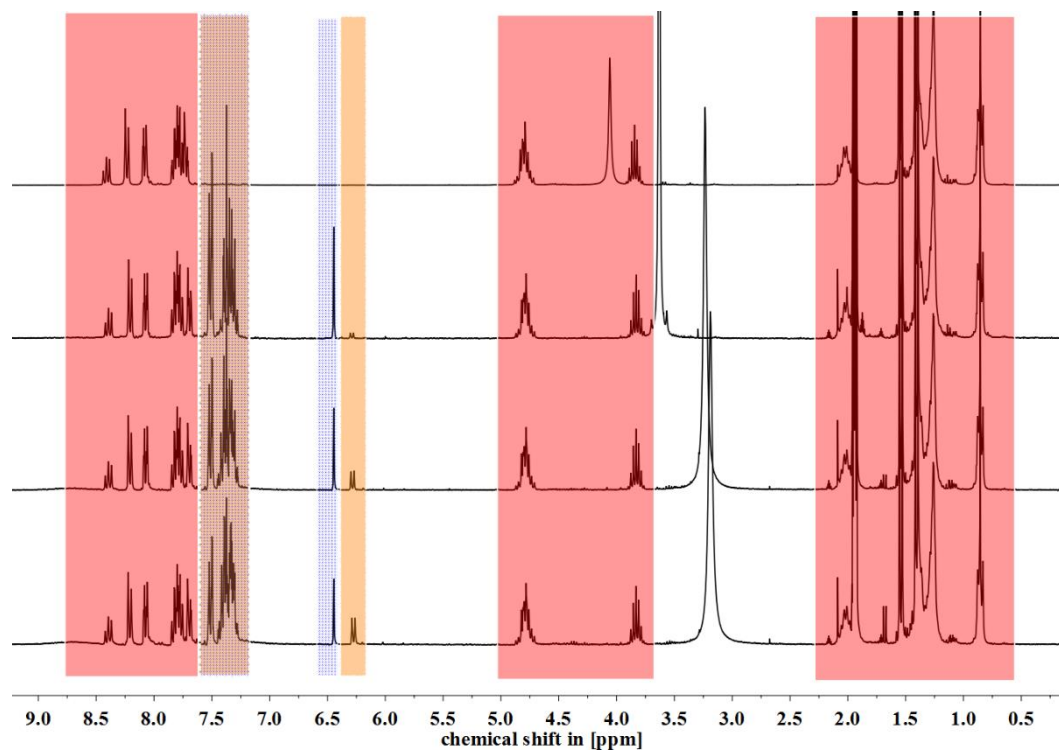

Top:  $\text{syn-6}^{\text{N-Oct/Se-iPr}}$ ; Second: Reaction after 6h; Third: Reaction after 69h; Last: Reaction after 140h.  
red:  $\text{syn-6}^{\text{N-Oct/Se-iPr}}$ , orange: compound 1 and blue dotted: compound 2.

**Figure 5:** Selected  $^1\text{H}$  NMR spectra of blank reaction after 144h in  $\text{MeCN-}d_3$ .

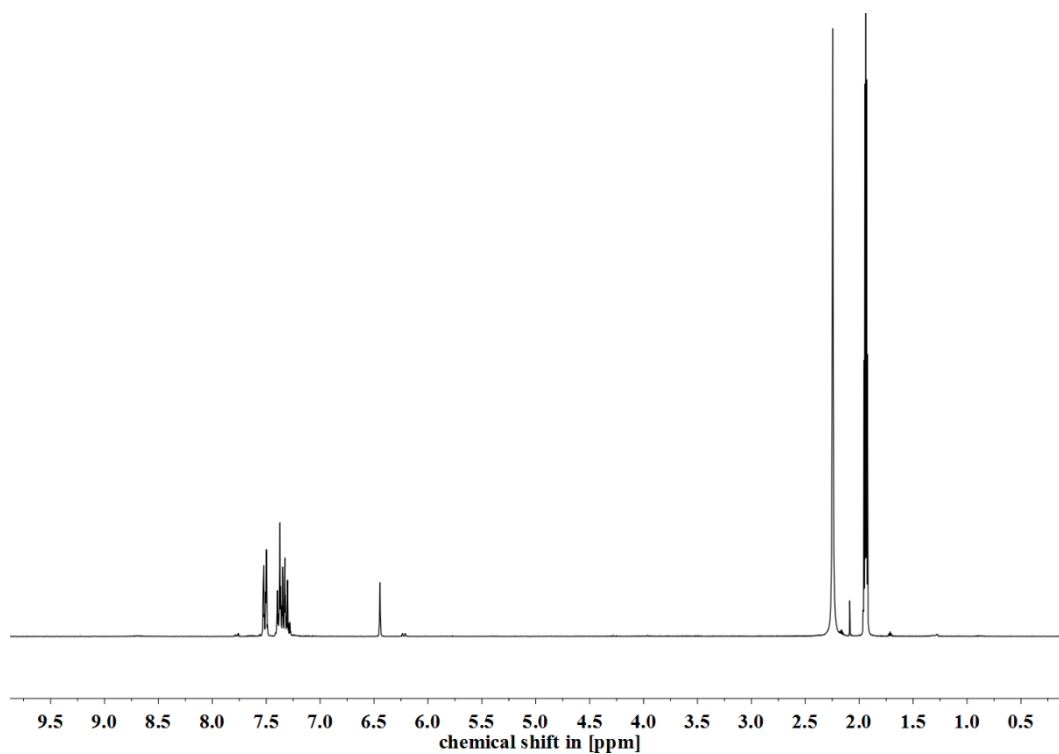

**Figure 6:** Selected  $^1\text{H}$  NMR and spectra of  $\text{syn-6}^{\text{N-Oct/Se-Me}}$  catalysed reaction (down) after 96h showing decomposition (red) and  $\text{syn-5}^{\text{N-Oct}}$  donor (up) in  $\text{MeCN-}d_3$ .

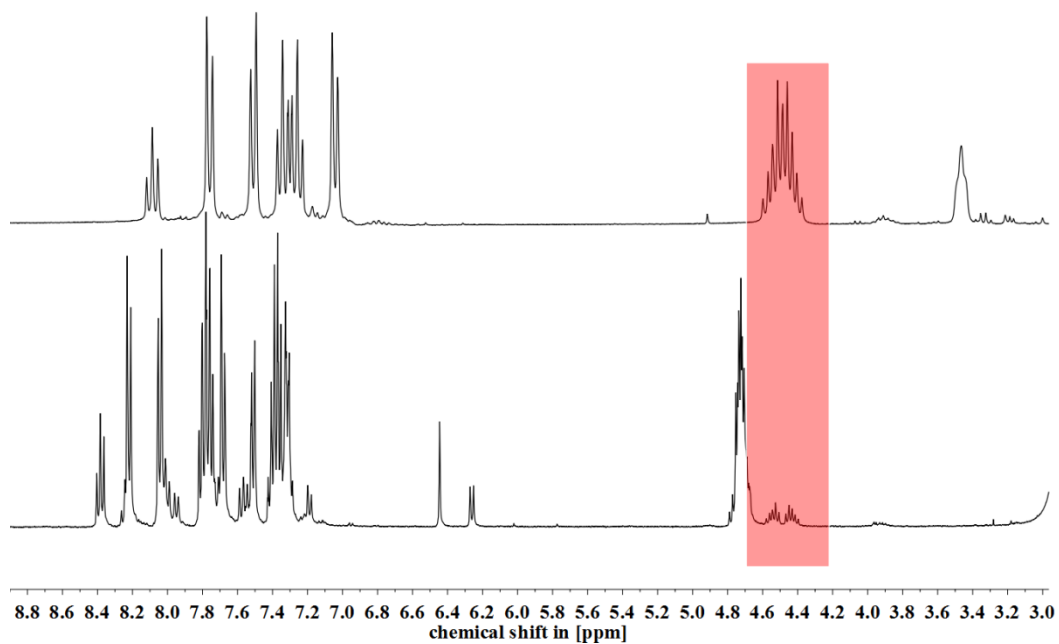

**Figure 7:**  $^1\text{H}$  NMR spectra of catalysed reaction with  $\text{syn-6}^{\text{N-Oct/Se-Me}}$  showing decomposition of catalyst (red) and formation of MeBr (blue) in  $\text{MeCN-}d_3$ .

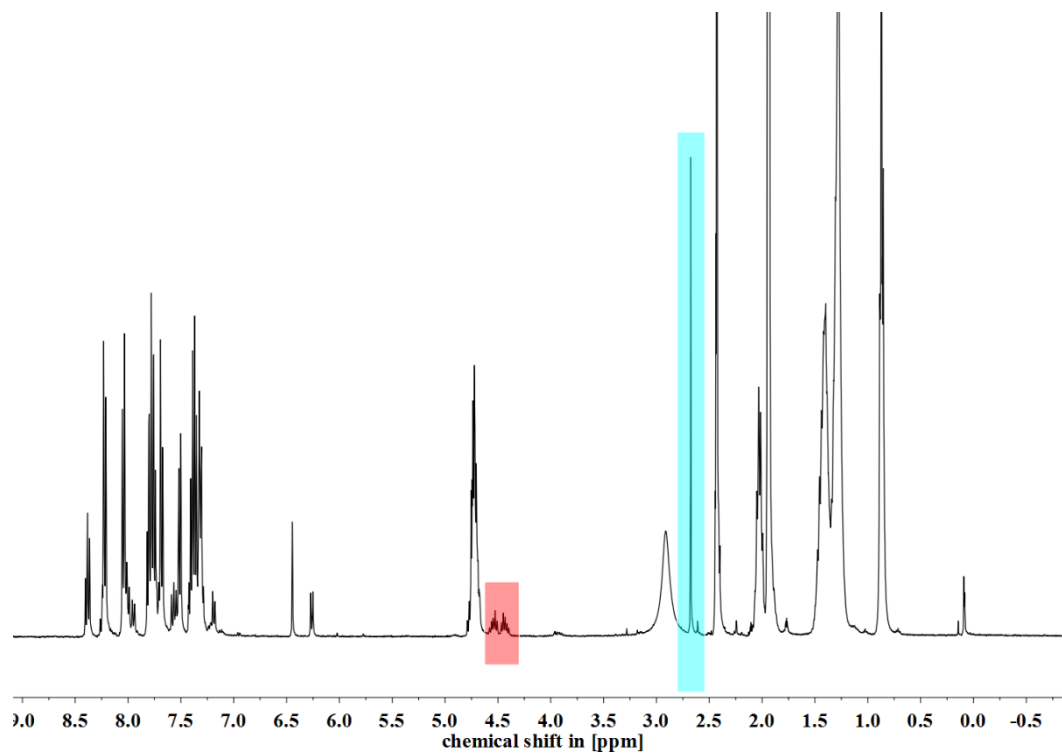

**Figure 8:**  $^{19}\text{F}$  NMR spectra of catalysed reaction with  $\text{syn-6}^{\text{N-Oct/Se-Me}}$  showing decomposition of the donor (red: Donor, blue: mono dealkylated ChB-Donor ca. 40%) in  $\text{MeCN-}d_3$ .

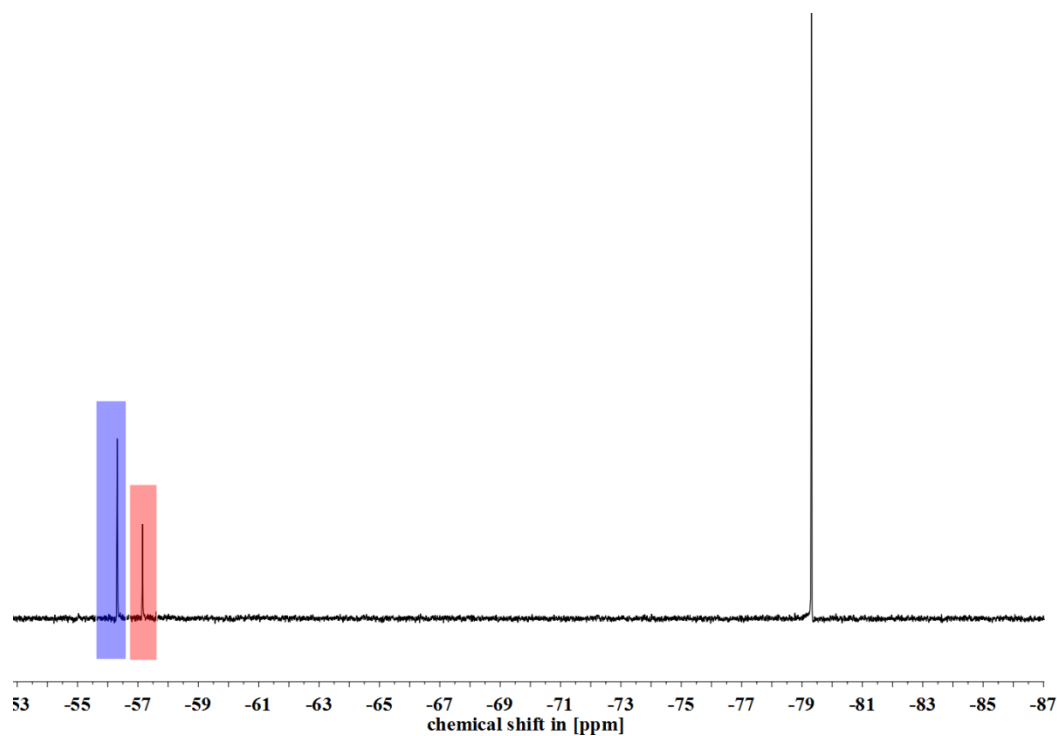

**Figure 9:**  $^{19}\text{F}$  NMR spectra of catalysed reaction with  $\text{syn-6}^{\text{N-Me/Se-Oct}}$  donor showing decomposition of the donor (red: Donor, blue: mono dealkylated ChB-Donor, 20%) in  $\text{MeCN-}d_3$ .

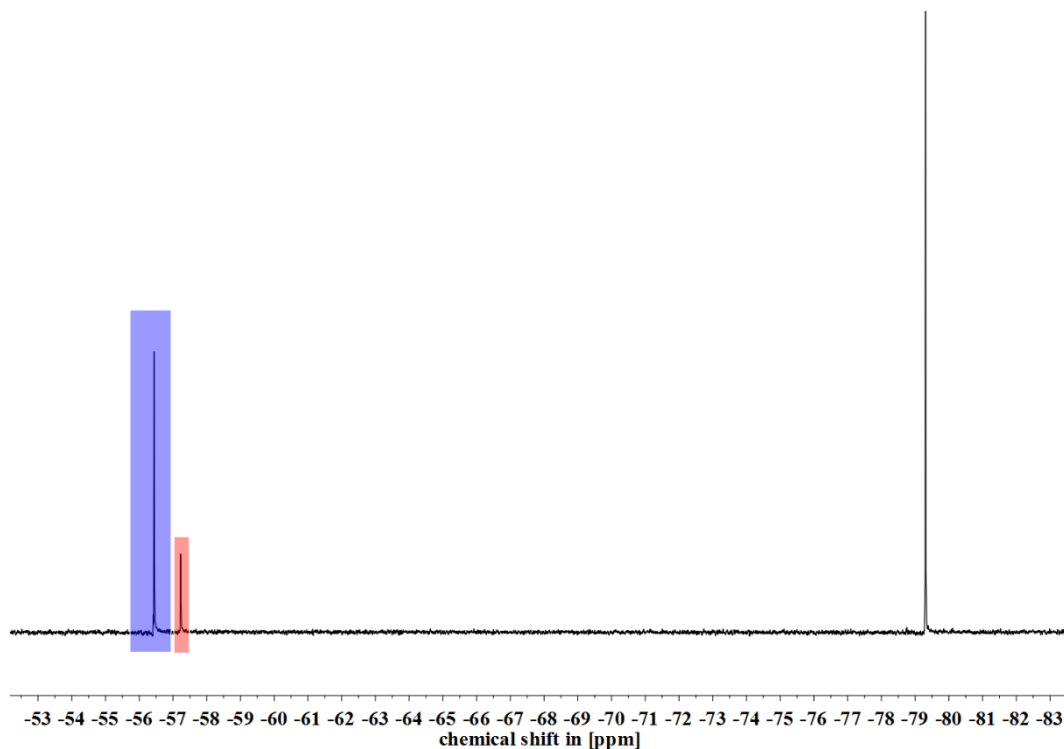

**Figure 10:**  $^{19}\text{F}$  NMR spectra of catalysed reaction with  $\text{syn-6}^{\text{N-Oct/Se-iPr}}$  showing decomposition of the donor (red: Donor, blue: mono dealkylated ChB-Donor ca. 4%) in  $\text{MeCN-}d_3$ .

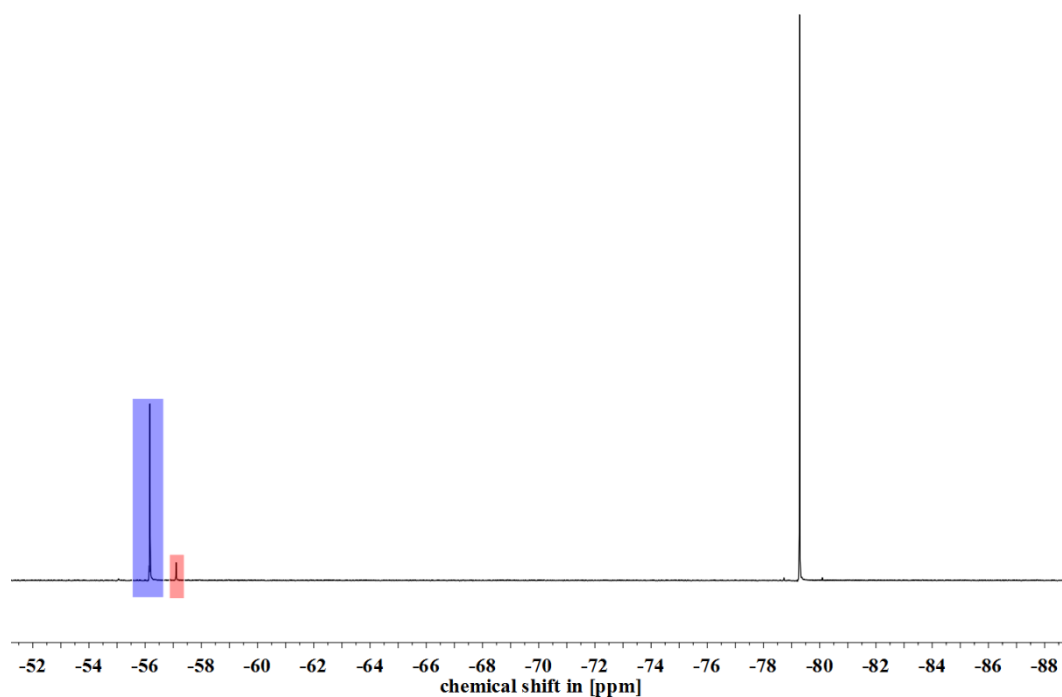

## 7. XRD Data

**Table 1.** Crystallographic data of *anti-6*<sup>N-Me/Se-Me</sup>

| <b>PW-0075-s</b>                                   |                                                                                                             |
|----------------------------------------------------|-------------------------------------------------------------------------------------------------------------|
| Empirical formular                                 | C <sub>27</sub> H <sub>23</sub> F <sub>9</sub> N <sub>4</sub> O <sub>6</sub> S <sub>2</sub> Se <sub>2</sub> |
| Formular weight [g·mol <sup>-1</sup> ]             | 892.53                                                                                                      |
| Temperature [K]                                    | 170(2)                                                                                                      |
| λ [Å]                                              | MoK <sub>α</sub> , 0.71073                                                                                  |
| Crystal system                                     | Monoclinic                                                                                                  |
| Space group                                        | P2 <sub>1</sub> /c                                                                                          |
| a [Å]                                              | 19.3379(10)                                                                                                 |
| b [Å]                                              | 12.3218(7)                                                                                                  |
| c [Å]                                              | 27.5669(15)                                                                                                 |
| β [°]                                              | 91.825(5)                                                                                                   |
| V [Å <sup>3</sup> ]                                | 6565.3(6)                                                                                                   |
| Z                                                  | 8                                                                                                           |
| ρ <sub>ber</sub> [g·cm <sup>-3</sup> ]             | 1.806                                                                                                       |
| μ [mm <sup>-1</sup> ]                              | 2.479                                                                                                       |
| <b>F(000)</b>                                      | <b>3536.0</b>                                                                                               |
| 2θ for data collection [deg]                       | 5.8 - 25                                                                                                    |
| Index-ranges                                       | <b>-22 ≤ h ≤ 22,</b><br><b>-14 ≤ k ≤ 14,</b><br><b>-32 ≤ l ≤ 32</b>                                         |
| Reflections collected                              | 91875                                                                                                       |
| Independent reflections                            | 10393                                                                                                       |
| R <sub>int</sub>                                   | 0.089                                                                                                       |
| S <sup>a)</sup>                                    | 1.024                                                                                                       |
| R <sub>1</sub> [I ≥ 2σ(I)/all data] <sup>b)</sup>  | 0.080/ 0.1036                                                                                               |
| wR <sub>2</sub> [I ≥ 2σ(I)all data,] <sup>c)</sup> | 0.1787/ 0.1909                                                                                              |
| Residual electron density<br>[e Å <sup>-3</sup> ]  | 1.241/ -1.286                                                                                               |
| CCDC number                                        |                                                                                                             |

a)  $S = \{\sum[w(F_0^2 - F_c^2)^2]/(n - p)\}^{0.5}$ ,  $n$  = number of reflections,  $p$  = number of parameters.

b)  $R_1 = \sum|F_0| / \sum|F_c|$ . c)  $wR_2 = \{\sum[w(F_0^2 - F_c^2)^2 / \sum[(F_0^2)^s]]\}^{0.5}$

- [1] S. H. Jungbauer, S. M. Huber, *J. Am. Chem. Soc.* **2015**, *137*, 12110-12120.
- [2] Thordarson, P.; *Chem. Soc. Rev.* **2011**, *40*, 1305.
- [3] Y. Zhao and D. G. Truhlar, *Theor. Chem. Acc.* **2008**, *120*, 215.
- [4] Gaussian 09, Revision D.01, M. J. Frisch, G. W. Trucks, H. B. Schlegel, G. E. Scuseria, M. A. Robb, J. R. Cheeseman, G. Scalmani, V. Barone, B. Mennucci, G. A. Petersson, H. Nakatsuji, M. Caricato, X. Li, H. P. Hratchian, A. F. Izmaylov, J. Bloino, G. Zheng, J. L. Sonnenberg, M. Hada, M. Ehara, K. Toyota, R. Fukuda, J. Hasegawa, M. Ishida, T. Nakajima, Y. Honda, O. Kitao, H. Nakai, T. Vreven, J. A. Montgomery, Jr., J. E. Peralta, F. Ogliaro, M. Bearpark, J. J. Heyd, E. Brothers, K. N. Kudin, V. N. Staroverov, R. Kobayashi, J. Normand, K. Raghavachari, A. Rendell, J. C. Burant, S. S. Iyengar, J. Tomasi, M. Cossi, N. Rega, J. M. Millam, M. Klene, J. E. Knox, J. B. Cross, V. Bakken, C. Adamo, J. Jaramillo, R. Gomperts, R. E. Stratmann, O. Yazyev, A. J. Austin, R. Cammi, C. Pomelli, J. W. Ochterski, R. L. Martin, K. Morokuma, V. G. Zakrzewski, G. A. Voth, P. Salvador, J. J. Dannenberg, S. Dapprich, A. D. Daniels, Ö. Farkas, J. B. Foresman, J. V. Ortiz, J. Cioslowski, and D. J. Fox, Gaussian, Inc., Wallingford CT, **2009**.
- [5] F. Weigend and R. Ahlrichs, *Phys. Chem. Chem. Phys.* **2005**, *7*, 3297.
- [6] C. Y. Legault, CYLview, 1.0b, Université de Sherbrooke, **2009**,  
<http://www.cylview.org>
